1 **Vital role for *Plasmodium berghei* Kinesin8B in axoneme assembly during male**  
2 **gamete formation and mosquito transmission**

3  
4  
5 **D. Depoix<sup>1\*</sup>, S.R. Marques<sup>2</sup>, D.J.P. Ferguson<sup>3</sup>, S. Chaouch<sup>1</sup>, T. Duguet<sup>1,4</sup>, R.E. Sinden<sup>2</sup>, P.**  
6 **Grellier<sup>1</sup>, L. Kohl<sup>1</sup>**

7  
8 <sup>1</sup> UMR 7245 CNRS Molécules de Communication et Adaptation des Micro-organismes, Muséum National d'Histoire  
9 Naturelle, Sorbonne Universités, CP52, 61 rue Buffon, 75231 Paris Cedex 05, France

10  
11 <sup>2</sup> Department of Life Sciences, Imperial College of London, London, United Kingdom

12  
13 <sup>3</sup> Nuffield Department of Clinical Laboratory Science, University of Oxford, Oxford, United Kingdom

14  
15 <sup>4</sup> Institute of Parasitology, Macdonald Campus, McGill University 21, 111 Lakeshore Road H9X3V9, Sainte-Anne-de-  
16 Bellevue QC, Canada

17  
18 **Running title: *PbKIN8B* is crucial for male gametogenesis and life cycle**

19  
20 **Corresponding author:**

21 Delphine Depoix, [delphine.depoix@mnhn.fr](mailto:delphine.depoix@mnhn.fr)

22

23

24

## 25 **Summary**

26 Sexual development is an essential phase in the *Plasmodium* life cycle, where male gametogenesis is  
27 an unusual and extraordinarily rapid process. It produces 8 haploid motile microgametes, from a  
28 microgametocyte within 15 minutes. Its unique achievement lies in linking the assembly of 8  
29 axonemes in the cytoplasm to the three rounds of intranuclear genome replication, forming motile  
30 microgametes, which are expelled in a process called exflagellation. Surprisingly little is known about  
31 the actors involved in these processes. We are interested in kinesins, molecular motors that could play  
32 potential roles in male gametogenesis. We have undertaken a functional characterization in  
33 *Plasmodium berghei* of kinesin-8B (PbKIN8B) expressed specifically in male gametocytes and  
34 gametes. By generating *Pbkin8B-gfp* parasites, we show that PbKIN8B is specifically expressed  
35 during male gametogenesis and is associated with the axoneme. We created a  $\Delta Pbkin8B$  knockout  
36 cell line and analysed the consequences of the absence of PbKIN8B on male gametogenesis. We  
37 show that the ability to produce sexually differentiated gametocytes is not affected in  $\Delta Pbkin8B$   
38 parasites and that the 3 rounds of genome replication occur normally. Nevertheless, the development  
39 to free motile microgametes is halted and the life cycle is interrupted *in vivo*. Ultrastructural analysis  
40 revealed that intranuclear mitoses is unaffected whereas cytoplasmic microtubules, although  
41 assembled in doublets and elongated, fail to assemble in the normal axonemal “9+2” structure and  
42 become motile. Absence of a functional axoneme prevented microgamete assembly and release from  
43 the microgametocyte, severely reducing infection of the mosquito vector. This is the first functional  
44 study of a kinesin involved in male gametogenesis. These results reveal a previously unknown role  
45 for PbKIN8B in male gametogenesis, providing new insights into *Plasmodium* flagellar formation.

46

## 47 **Introduction**

48 *Plasmodium* parasites infect a large number of animal species and are responsible for malaria in  
49 humans. In 2017, an estimated 219 million cases of malaria and 435,000 malaria deaths were reported  
50 worldwide (World Health Organization, 2018). In most cases, malaria infections in humans are  
51 treated by artemisinin-based combination therapies, where 2 effective components with different  
52 modes of action and pharmacokinetic properties are combined. Emerging drug resistance makes it  
53 essential to search for new anti-malaria compounds and new targets in the parasite (Ouji, Augereau,  
54 Paloque, & Benoit-Vical, 2018) as no efficient vaccine for malaria is currently available.

55 During its life cycle, *Plasmodium* alternates between a vertebrate host and an insect vector, the female  
56 *Anopheles* mosquito. With an infective bite, the mosquito injects sporozoites in the vertebrate host,  
57 where they invade and multiply asexually, first in liver cells, and then in red blood cells. During the  
58 erythrocytic phase, a small fraction of parasites differentiate into sexual stages, male and female  
59 gametocytes. Circulating gametocytes are arrested at a G<sub>0</sub>-like stage until they are taken up by a  
60 mosquito. In the mosquito midgut, gametocytogenesis is activated when parasites are exposed to a  
61 drop in temperature, a pH increase and to xanthurenic acid (XA), a mosquito derived gametocyte-  
62 activating factor (Billker et al., 1998; Sinden, 1983; Sinden, Canning, & Spain, 1976). These changes  
63 trigger Ca<sup>2+</sup> mobilization from internal stores which requires active cGMP-dependent protein kinase  
64 G (Bennink, Kiesow, & Pradel, 2016; Billker et al., 2004). While female gametogenesis involves  
65 limited morphological changes beyond escape from the host erythrocyte, male gametogenesis  
66 implicates rapid and spectacular changes (Sinden et al., 1976). In the first few minutes after activation,  
67 male gametocytes egress from the red blood cells and three rounds of rapid intranuclear DNA  
68 replication take place, resulting in an uninucleate cell with a nuclear DNA content multiplied by 8.  
69 This is accompanied by, and physically linked to, the simultaneous formation of 8 axonemes in the  
70 cytoplasm. *Plasmodium* axonemes display a classical “9+2” structure: 9 doublets of microtubules  
71 arranged in a circular pattern surrounding a central pair of singlet microtubules (reviewed in  
72 (Ishikawa, 2017)). Their mode of assembly is unusual: *Plasmodium* axonemes are assembled in the

73 cytoplasm of the microgametocyte independent of intraflagellar transport, a bidirectional transport  
74 machinery essential for the construction of flagella in most other eukaryotes (Prevo, Scholey, &  
75 Peterman, 2017). The components of the axoneme, such as tubulin, are ubiquitous in the cytoplasm  
76 and are assembled upon activation (Kooij et al., 2005). The nuclear envelope does not break down  
77 during the 3 mitotic replications. The axonemes are however linked to the 8 replicated haploid  
78 genomes in the nucleus through spindle poles situated in nuclear pores, thus forming 8 flagellated  
79 motile microgametes, which, following violent axonemal ‘swimming’ are expelled from the  
80 microgametocyte in an exceptionally fast process called “exflagellation” (Sinden, 1983; Sinden et al.,  
81 1976). When a motile gamete encounters a female gamete, fertilization takes place resulting in a  
82 zygote. The axoneme remains intact for approximately 5 mins after fertilization, before being  
83 depolymerized in the zygote. The zygote develops into a motile and invasive ookinete, which after  
84 attachment and migration through the midgut epithelium, transforms into an oocyst. After  
85 approximately two weeks, the oocyst gives rise to sporozoites which migrate to the salivary glands  
86 and continue the parasite life cycle when injected into a new host (Bennink et al., 2016).

87 The sexual phase is essential to the parasite life cycle and considerable progress has been made in  
88 recent years in elucidating the molecular mechanisms governing this important differentiation  
89 process. In particular, a number of critical transcription factors and epigenetic regulators have  
90 emerged as crucial elements in the regulation of *Plasmodium* sexual commitment, allowing a better  
91 understanding of the events occurring prior to and during commitment to sexual development  
92 (Filarsky et al., 2018; Kafsack et al., 2014; Kent et al., 2018; Sinha et al., 2014). During the last years,  
93 several proteomic studies identified proteins present during the sexual stages and recently the  
94 importance of phosphoregulation was highlighted during gametogenesis (Garcia et al., 2018; Khan et  
95 al., 2005; Talman et al., 2014, Invergo et al., 2017). However, surprisingly little is known about the  
96 dramatic processes and the actors leading to free motile male gametes e.g. the molecular foundation  
97 of microgametes and how they are expelled from the microgametocyte. These dynamic processes will  
98 certainly require motor proteins, such as kinesins and dyneins, to transport cargoes, assemble the

99 structure and generate the force for motility. Most dyneins involved in motility, are part of the  
100 complex organisation of outer and inner dynein arms present on each doublet microtubule (Oda, Abe,  
101 Yanagisawa, & Kikkawa, 2016; Roberts, Kon, Knight, Sutoh, & Burgess, 2013). In *Plasmodium*,  
102 inner dynein arms are seen less often than outer dynein arms and appear thinner in electron  
103 microscopy studies (Talman et al., 2014). This could be correlated to the absence of several inner  
104 dynein arm coding genes in the *Plasmodium* genome (Wickstead & Gull, 2007).

105 Only 10 kinesin encoding genes are found in the *P. berghei* genome, fewer than in other eukaryotes  
106 (Wickstead, Gull, & Richards, 2010). Among the kinesins identified by proteomic studies of sexual  
107 stages, only three are present in male gametocytes and gametes (Garcia et al., 2018; Khan et al., 2005;  
108 Talman et al., 2014). According to the comprehensive study of kinesins across eukaryotes by  
109 Wickstead et al. (2010), they belong to the families kinesin-8 (subfamily 8B), -13 and -15. Those  
110 kinesins are among the microtubule motors phosphoregulated during *P. berghei* gametocyte  
111 activation (Invergo et al., 2017). We decided to study the roles of kinesins in microgametogenesis  
112 and in particular the role(s) of kinesin-8B, the only male-specific kinesin. It will be referred to as  
113 PbKIN8B in the rest of the manuscript.

114 While most kinesins display predominantly one activity, either transport along microtubules or  
115 depolymerization, kinesin-8 family members are reportedly multitasking. They can walk on  
116 microtubules, but also regulate microtubule length, during mitosis (Gergely, Crapo, Hough,  
117 McIntosh, & Betterton, 2016; Grissom et al., 2009; Gupta, Carvalho, Roof, & Pellman, 2006;  
118 McHugh, Gluszek, & Welburn, 2018; Savoian & Glover, 2010), and/or ciliary and flagellar assembly  
119 (Hu, Liang, Meng, Wang, & Pan, 2015; Niwa et al., 2012; Wang et al., 2016). In *Plasmodium*,  
120 PbKIN8B could therefore be involved in several steps of microgametogenesis, such as DNA  
121 replication, axoneme assembly and function, as well as male gamete exflagellation.

122 Using the rodent model *P. berghei*, we show that PbKIN8B is associated with the axoneme of the  
123 microgamete. Its absence causes striking defects in axonemal structure and leads to failure to infect  
124 the mosquito and thus complete the parasite lifecycle.

125 **Results**

126

127 ***Kinesins in Plasmodium***

128 To study kinesin motor proteins and to determine their potential role in *Plasmodium* male  
129 gametogenesis, we first compiled the known data on the proteins and their encoding genes, using the  
130 nomenclature of Wickstead et al. (2010). Nine kinesins were identified in *P. falciparum*, but the  
131 genome of several other *Plasmodium* species (*P. berghei*, *P. chabaudi*, *P. yoelii*, *P. knowlesi*) encodes  
132 an additional protein, kinesin-4 (PBANKA\_1208200) (Table 1). *P. berghei* possesses orthologues for  
133 the kinesins identified in *P. falciparum*, either belonging to known kinesin families or currently  
134 unclassified (Table 1). Recent RNAseq studies demonstrated expression of *P. berghei* kinesins in  
135 sexual stages (male and female) (Otto et al., 2014; Yeoh, Goodman, Mollard, McFadden, & Ralph,  
136 2017). Three kinesins were found expressed in male gametocytes and gametes by proteomic analysis  
137 (Khan et al., 2005; Talman et al., 2014): PbKIN8B, KIN13 and KIN15. As KIN13 and KIN15 are  
138 essential in the erythrocytic stage, we focussed on PbKIN8B. In *P. berghei*, PbKIN8B is composed  
139 of 1460 aa with a predicted molecular weight of 168,81 kDa and encoded by the PB\_0202700 gene  
140 (4819 nt). PbKIN8B encompasses a classical motor domain positioned centrally [aa 779- 1118] with  
141 8 predicted ATP binding sites [aa 787, 872, 875, 877, 878, 879, 880, 1018] and 3 predicted  
142 microtubule interaction sites [aa 1071, 1074, 1077]. With the exception of the kinesin motor domain  
143 and of coiled-coil motives in the C-terminal region, no additional protein signatures or nuclear  
144 localisation signals (NLS) were detected.

145

146

147

148

149

150

151 **Table 1. Main characteristics of *Plasmodium berghei* kinesins: protein features, proteomic data**  
 152 **in sexual stages, phenotypic analysis in erythrocytic stages.**

153

| Kinesin family (Pb gene ID/Pf gene ID)                                                                                                             | Protein features        | Gametocyte              | Male gamete | Asexual Phenotype  |
|----------------------------------------------------------------------------------------------------------------------------------------------------|-------------------------|-------------------------|-------------|--------------------|
| <b>Kinesin 4</b> (PBANKA_1208200) – 2876 aa<br>                   | ATP/Coil<br>WD40<br>NLS | Female<br>Mixed         |             | slow               |
| <b>Kinesin-5</b> (PBANKA_0807700/ PF3D7_0317500) – 1440 aa<br>    | ATP/MT<br>Coil<br>NLS   | ND                      |             | ND                 |
| <b>Kinesin-8X</b> (PBANKA_0805900/PF3D7_0319400) – 1409 aa<br>    | ATP/MT<br>Coil<br>NLS   | ND                      |             | dispensable        |
| <b>Kinesin-8B</b> (PBANKA_0202700/PF3D7_0111000) – 1460 aa<br>    | ATP/MT                  | <b>Male<br/>Mixed</b>   | <b>yes</b>  | <b>dispensable</b> |
| <b>Kinesin-13</b> (PBANKA_1458300 / PF3D7_1245100) – 1025 aa<br>  | ATP/ MT                 | Female<br>Male<br>Mixed | yes         | essential          |
| <b>Kinesin-15</b> (PBANKA_1458800/PF3D7_1245600) – 1414 aa<br>  | ATP                     | Male<br>Mixed           | yes         | essential          |
| <b>Kinesin-20*</b> (PBANKA_0622400/PF3D7_0724900) – 2113 aa<br> | ATP/MT<br>Coil<br>NLS   | ND                      |             | dispensable        |
| <b>Kinesin-X3*</b> (PBANKA_0609500/PF3D7_1211000) – 1603 aa<br> | ATP/MT<br>NLS           | Mixed                   |             | ND                 |
| <b>Kinesin-X4*</b> (PBANKA_0902400/PF3D7_1146700 – 771 aa<br>   | ATP<br>Coil             | ND                      |             | dispensable        |
| <b>Kinesin-like</b> (PBANKA_1224100/PF3D7_0806600) – 727 aa<br> | ATP/Coil<br>NLS         | ND                      |             | slow               |

154

155 *Gene identifiers are shown for P. berghei ANKA and P. falciparum 3D7 (Plasmodb.org). Seven proteins have been*  
 156 *associated to known kinesin families (nomenclature from (Wickstead, Gull, et al., 2010), three proteins could not be*  
 157 *classified. Protein features were determined using PROSITE (Sigrist et al., 2013) and cNLS mapper (Kosugi, Hasebe,*  
 158 *Tomita, & Yanagawa, 2009). In addition to the conserved kinesin motor domain with ATP binding sites and microtubule*  
 159 *interaction (MT) sites, most proteins display coiled-coil motifs, which could be involved in protein oligomerisation.*  
 160 *Kinesin-4 presents a WD40 motif, often implicated in protein-protein interactions. Proteomic data of purified male and*  
 161 *female gametocytes (Khan et al., 2005), male gametes (Talman et al., 2014), and phenotypic data of asexual stages*  
 162 *(Bushell et al., 2017) are presented when available. The asterisk indicates a difference in family affiliation between*  
 163 *Plasmodb.org and Wickstead et al (2010) (Wickstead, Gull, et al., 2010). The characteristics of PbKIN8B are highlighted*  
 164 *in bold. The motor domain is represented by an orange oval, ATP binding sites are shown in blue and microtubule*

165 interacting sites in red. Protein features are depicted by coloured polygons (coil-coil region in blue and WD40 region in  
166 green).

167

## 168 **PbKIN8B is specific to male gametocytes and gametes and is associated with the axoneme**

169 During *Plasmodium* gametogenesis, mitosis and axoneme assembly are interconnected and happen  
170 at the same time. We wanted to know whether PbKIN8B could be involved in these processes.

171 PbKIN8B localization was determined in the rodent model *Plasmodium berghei* by tagging the  
172 *Pbkin8B* with *gfp* at the C-terminal end. After transfection, a single crossover recombination at the  
173 endogenous PBANKA\_0202700 locus resulted in a cell line expressing a *Pbkin8B-gfp* fusion protein.

174 Two clones resulting from two independent transfections (*Pbkin8B-gfp-cl4* and *Pbkin8B-gfp-cl6*)  
175 were isolated and the correct integration of the plasmid in the genome was confirmed by PCR (Fig  
176 S1 A, B).

177 The expression of the hybrid protein did not impact on the progression of the parasite asexual  
178 erythrocytic cycle. *Pbkin8B-gfp* parasites produced gametocytes in similar quantities to wt parasites  
179 with a similar sex ratio (Fig S1C, D). The parasites were transmitted to mosquitoes and naïve mice,  
180 similar to wt (see below). The *Pbkin8B-gfp* cell lines express a protein of approximately 180 kDa,  
181 recognized by an anti-GFP antibody, consistent with the calculated molecular weight of the tagged  
182 protein (*i.e.* 187 kDa) (Fig 1A). The hybrid protein is expressed only in the sexual stage and is not  
183 detected in asexual parasites or in wt (Fig 1A).

184 We then studied the cellular localization of PbKIN8B, by following the expression of *Pbkin8B-gfp*  
185 by IFA at different stages of the life cycle (Fig 1B). Male and female gametocytes can be easily  
186 distinguished during the course of gametogenesis because amount of tubulin (seen by the marker  
187  $\alpha$ -tubulin II (Kooij et al., 2005)) and DAPI intensity vary: they increase in male gametocytes, while  
188 remaining almost constant in female gametocytes. *PbKIN8B-gfp* could not be detected in asexual  
189 parasites, nor in female gametocytes.

190 In unactivated male gametocytes, the protein shows a uniform cytosolic distribution, with the  
191 exclusion of the nuclear region. Upon activation by XA, *in vitro*, the localization of the *Pbkin8B-gfp*



192 signal changes and is seen as punctiform lines with spatial and temporal dynamics similar to the  
193 axonemal marker  $\alpha$ -tubulin II (Fig 1B).  
194 After exflagellation, the *Pbkin8B-gfp* signal is detected in the male gametes, but it can not be detected  
195 after fertilization in ookinetes (data not shown). This could be due to a diffuse localization of the  
196 protein in the ookinete and the oocyst, hindering its detection under the conditions used for IFA or an  
197 absence of PbKIN8B at these stages.  
198

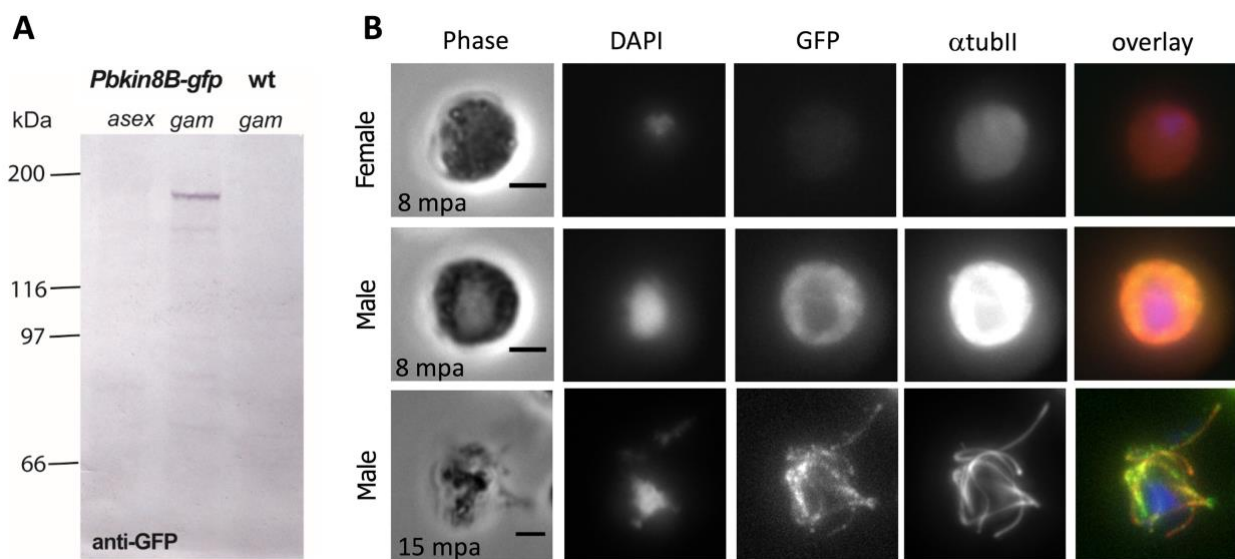

199

200 **Fig 1. *Pbkin8B-gfp* is specifically expressed in male gametocytes and localizes to the axoneme.**

201 (A) Western blot of *Pbkin8B-gfp* erythrocytic stages showing expression of a 190 kDa protein only in gametocytes  
202 (*Pbkin8B-gfp gam*). No signal was detected in *Pbkin8B-gfp* asexual stages (*Pbkin8B-gfp asex*) nor in *wt* gametocytes (*wt*  
203 *gam*). Similar results were obtained with both clones.

204 (B) Immunofluorescence assay of *Pbkin8B-gfp* male and female gametocytes at 8 minutes post activation (mpa) and  
205 exflagellating male gametes at 15 mpa. DAPI staining of DNA is seen in blue, anti- $\alpha$  tubulin II in red and anti-gfp in  
206 green. Immunofluorescence images correspond to the maximum intensity projection of the z-series. Gfp images were  
207 treated post capture using ImageJ for better visualisation (increase by 2 times for gfp gametocytes and 10 times for  
208 exflagellating microgametes). The colocalisation of  $\alpha$  tubulin II and gfp evidence male specific expression of *Pbkin8B-*  
209 *gfp*. Scale bar: 2  $\mu$ m.

210

211

212

213 **PbKIN8B plays a crucial role in exflagellation and fertilization *in vitro***

214 Several potential roles for PbKIN8B in male gametogenesis could be envisaged: it could be involved  
215 in mitosis, flagellum assembly/functioning and/or exflagellation. We generated *P. berghei* PbKIN8B  
216 knock-out parasites (named  $\Delta Pbkin8B$ ) by double homologous recombination using the Plasmogem  
217 construct PbGEM-267699 replacing the PbKIN8B encoding gene by a human *dhfr/ts* cassette (Fig  
218 S2 A-C). After selection by pyrimethanime and cloning by limiting dilution, two  $\Delta Pbkin8B$  clones,  
219 resulting from two independent transfections ( $\Delta Pbkin8B$ -c13600 and  $\Delta Pbkin8B$ -c13716), were  
220 obtained. Both cell lines show gametocyte numbers and sex ratio similar to wt parasites (Fig S2 D,  
221 E).

222 The  $\Delta Pbkin8B$  mutant parasites are able to form asexual and sexual blood stages, therefore mitosis in  
223 asexual blood stages is normal. The defects in the  $\Delta Pbkin8B$  mutant parasites are therefore restricted  
224 to microgametogenesis.

225 In blood containing wt gametocytes, induction by XA leads to the release of male gametes from  
226 microgametocytes within 15 min post activation (mpa), as well as adherence to surrounding red blood  
227 cells forming “exflagellation centres”. In  $\Delta Pbkin8B$  parasites no exflagellation centres were observed  
228 in 10 experiments (5 per clone), even after a prolonged induction period (up to 30 mpa). This contrasts  
229 strikingly with exflagellation in wt parasites ( $33,46 \pm 17,87$  exflagellation centres per 100 male  
230 gametocytes, at 15 mpa) (Fig 2A). No free male gametes were observed in the mutant lines.  
231 Recognising that rare gametes could have been missed in the mutant even with careful observation,  
232 and that an isolated male gamete could be sufficient to fertilise a female gamete, we performed an *in*  
233 *vitro* ookinete conversion assay to quantify the proportion of activated female gametes that converted  
234 into ookinetes. In wt parasites, the mean ookinete conversion rate was  $63.5 \pm 3.6$ , whereas it was only  
235  $1.2 \pm 1.4$  and  $0.2 \pm 0.2$  for  $\Delta Pbkin8B$  clones 3600 and 3716 (Fig 2B), indicating that a few viable male  
236 gametes were produced in the mutant that were able to fertilize the female gametes.

237

238

239 **PbKIN8B is essential for the completion of the life cycle *in vivo***

240 *In vitro* experiments do not necessarily reflect the complexity of the parasite life cycle, therefore we  
241 analysed the life cycle *in vivo* by transmitting wt and mutant parasites to mosquitoes and naïve mice.  
242 We determined the capacity for infection of  $\Delta Pbkin8B$  (2 independent clones), wt and *Pbkin8B-gfp*  
243 parasites. *A. stephensi* mosquitoes were allowed to feed on mice infected with the different parasite  
244 lines. Eight and twelve days post feeding, the midgut of the mosquitoes was dissected and the number  
245 of oocysts per midgut was determined (2 independent experiments). The two  $\Delta Pbkin8B$  mutant cell  
246 lines produced very few oocysts (mean range of 1.68/1.36 and 1.4/0.76 respectively) in comparison  
247 to wt and *Pbkin8B-gfp* parasites, where numerous oocysts were formed (mean values the 2 replicates  
248 of 180/171 and 187/160 oocysts per midgut respectively) (Fig 2C, Table S2). No sporozoites could  
249 be detected in the  $\Delta Pbkin8B$  oocysts under microscopy.

250 Since as few as 10 sporozoites would be sufficient to complete the life cycle (Churcher et al., 2017),  
251 we tested the ability of the parasites to infect mice. *A. stephensi* mosquitoes, fed 21 days prior on  
252 mice infected with  $\Delta Pbkin8B$ , wt or *Pbkin8B-gfp* parasites, were allowed to bite naïve 6- to 8-week-  
253 old female Tucks Ordinary mice. Wt and *Pbkin8B-gfp* fed mosquitoes were able to transmit parasites  
254 to the naïve mice, as observed on Giemsa stained blood smears at day 5 post feeding. In contrast,  
255 mosquitoes fed with  $\Delta Pbkin8B$ -cl3600 and cl3716 were unable to transmit parasites to naïve mice  
256 (Fig 2D). Parasitaemia was followed up to 14 days after feeding in the mice bitten by mosquitoes  
257 with  $\Delta PbKIN8B$  parasites, but no parasites were seen.

258

259

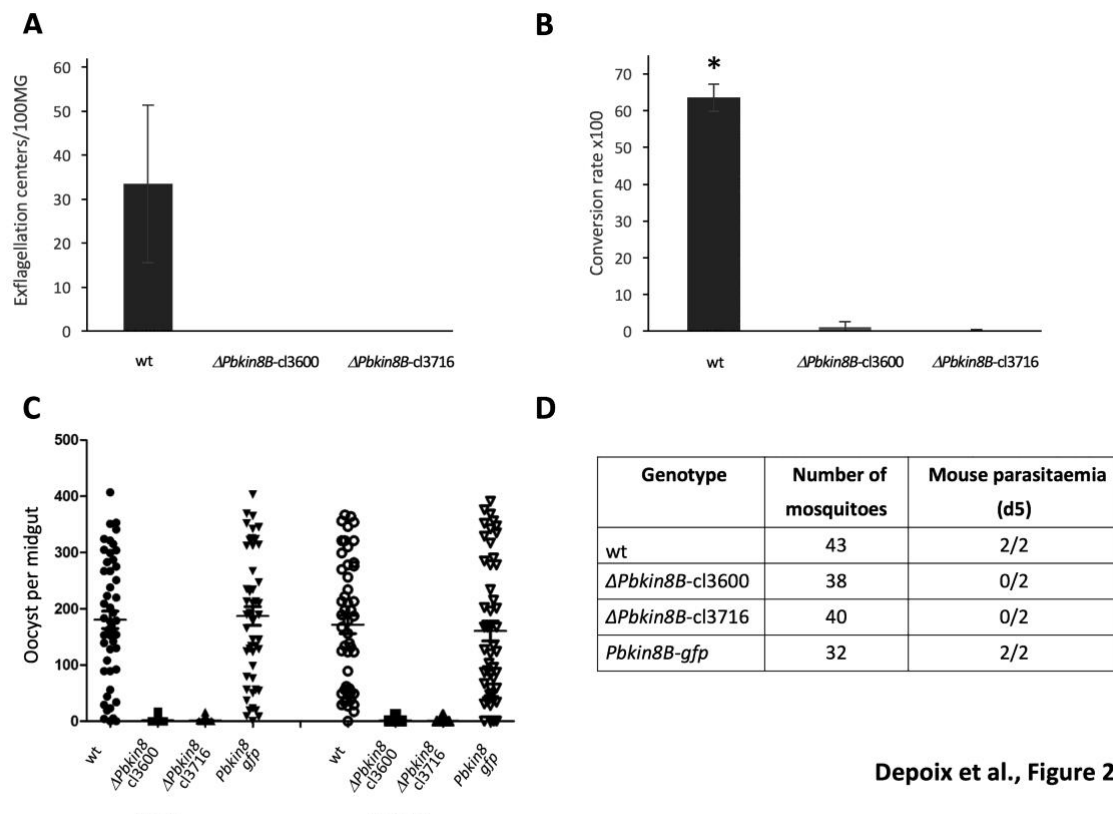

Depoix et al., Figure 2

260

261 **Fig 2.  $\Delta$ Pbkin8B parasites are unable to complete the parasite life cycle**

262 (A, B) *In vitro* analysis of the  $\Delta$ Pbkin8B mutant. (A) Comparison of exflagellation rates between  $\Delta$ Pbkin8B (clones 3600  
 263 and 3716) and wt cells at 15 mpa. Numbers of exflagellation centres are expressed relatively to 100 microgametocytes.  
 264 (B) Comparison of ookinete conversion rates between  $\Delta$ Pbkin8B (clones 3600 and 3716) and wt. For each replicate  
 265 (n=5), the conversion rate was calculated as the percentage of macrogametes that developed into ookinetes. Values  
 266 represent an average of more than 800 cells. SD are reported as bars on the figures. Asterisk (\*) indicate statistically  
 267 significant differences in Student's T-test with p-values lower than 0,01. (C, D) *In vivo* analysis of the  $\Delta$ Pbkin8B mutant  
 268 (2 clones). (C) Comparison of mosquito infection rates between  $\Delta$ Pbkin8B (clones 3600 and 3716), Pbkin8B-gfp and wt  
 269 parasites. At day 8 and day 12 post feeding, infected *A. stephensi* mosquitoes were dissected and oocysts, were counted  
 270 in each midgut. Detailed results are presented in Supplemental table 2. (D) Analysis of transmission of  $\Delta$ Pbkin8B,  
 271 Pbkin8B-gfp and wt parasites from mosquitoes to naïve mice. *A. stephensi* mosquitoes infected respectively with  
 272  $\Delta$ Pbkin8B, Pbkin8B-gfp and wt parasites, were allowed to bite naïve mice. Infection of mice was monitored at day 5 and  
 273 day 12 on Giemsa stained blood smears.

274

275

276

## 277 **Dissection of the role of PbKIN8B in male gametogenesis**

278 The  $\Delta Pbkin8B$  mutant displays little evidence of microgametes and is unable to complete the parasite  
279 life cycle, indicating a major defect in male gametogenesis. As this process is composed of different  
280 events such as host cell egress, DNA replication and axoneme formation, and finally exflagellation,  
281 we investigated each of these steps in the  $\Delta Pbkin8B$  mutant at different times post activation.

282 First, we followed cell egress in  $\Delta Pbkin8B$  mutant cells and wt cells, using an anti-spectrin antibody,  
283 which recognizes the most abundant protein in the red blood cell membrane skeleton. After induction  
284 by XA, both  $\Delta Pbkin8B$  and wt gametocytes were able to escape from the host cell membrane as  
285 shown by the weaker signal with the anti-spectrin antibody (Fig S3).

286 Second, we looked at the 3 rounds of endomitoses that occur consecutively during  
287 microgametogenesis resulting in an increase of the DNA content. In IFA, we were not able to see a  
288 localisation of *PbKIN8B-gfp* in the nucleus. During *Plasmodium* gametogenesis, mitosis and  
289 axoneme assembly are interconnected and happen in the same time. Defects in one process could  
290 influence the other. We therefore analysed DNA content in at least 30000 gametocytes at 0, 8 and 15  
291 mpa by XA, using flow cytometry (Fig 3A-C). We compared  $\Delta Pbkin8B$  gametocytes to wt and  
292  $\Delta cdpk4$  gametocytes, a mutant unable to undergo DNA replication (Billker et al., 2004). Gating was  
293 established within the YOYO+ population (P1). At time 0 min, in all cell lines, most gametocytes  
294 (male and female) possess a nuclear content corresponding to the P2 population (Fig 3A). Only a  
295 few cells with higher DNA content were detected in wt and  $\Delta Pbkin8B$  cells. During the course of the  
296 induction, the P2 population decreases slightly while the P3 population (highest DNA content cells)  
297 increases, indicating that the  $\Delta Pbkin8B$  microgametocytes replicate their DNA similar to wt, both in  
298 quantity and time frame (Fig 3B, C). The proportion of cells with highest DNA content in the sample  
299 (ratio P3/P1) increases by a factor of approximately 3 in wt and 4 in  $\Delta Pbkin8B$ . As expected, no  
300 change in DNA profile is observed in  $\Delta cdpk4$  cells over the time of the experiment (Fig 3C).

301

302

303

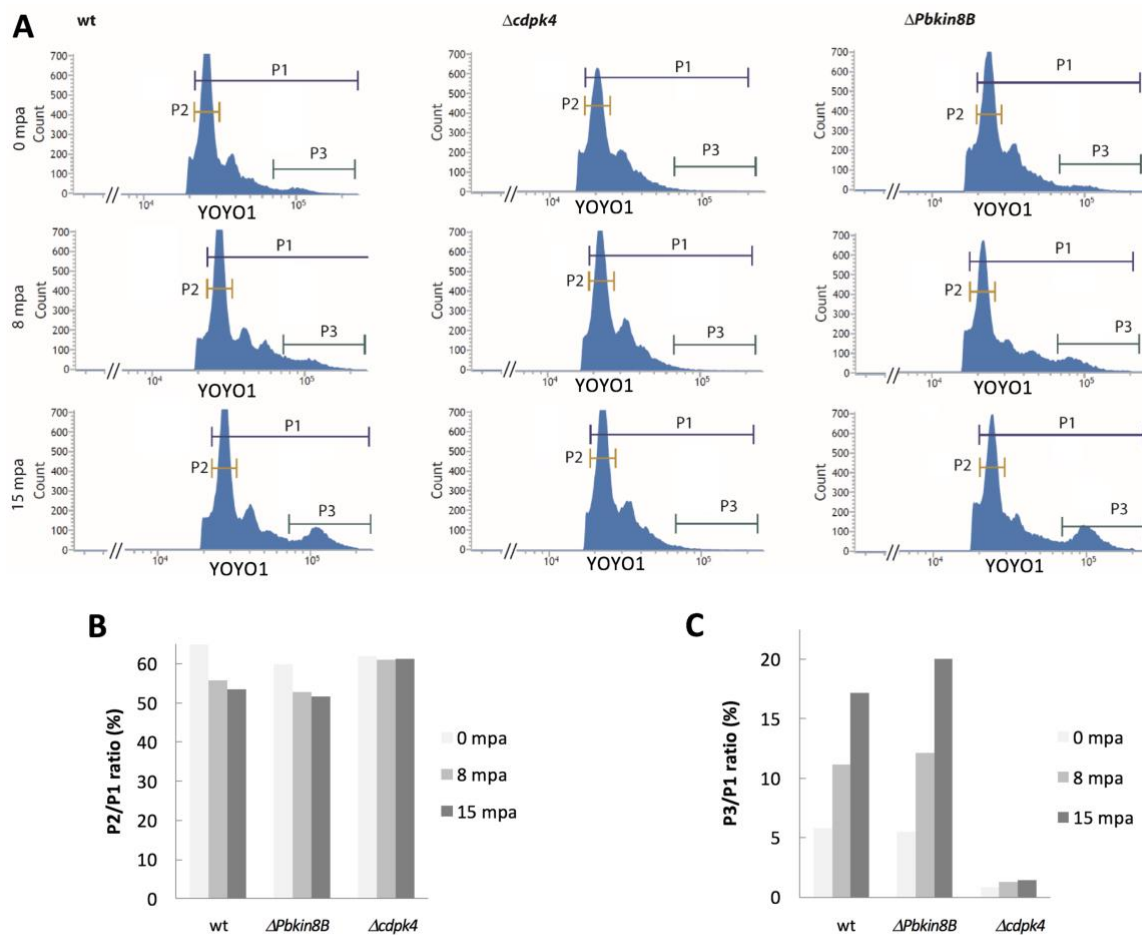

304

305 **Fig 3.  $\Delta Pbkin8B$  cells are able to replicate their DNA during male gametogenesis**

306 (A) Time course analysis of gametocyte DNA content by flow cytometry. Purified mixed gametocytes from  $\Delta Pbkin8B$ ,  
307  $\Delta cdpk4$  (unable to undergo DNA replication) and wt parasites were fixed at times 0, 8 and 15 mpa and DNA was labelled  
308 with YOYO-1. Gates were established defining populations P1 (total YOYO+ population), P2 (low DNA content cells),  
309 and P3 (high DNA content cells).

310 (B, C) Evolution over time of populations P2 and P3. Proportion of P2 cells (B), respectively P3 cells (C), relative to  
311 YOYO+ cells at times 0, 8 and 15 mpa.

312

313 Third, we analysed axoneme formation by IFA using an anti  $\alpha$ -tubulin II antibody, combined with  
314 DAPI staining (Fig 4). From the beginning of activation to 8 mpa,  $\Delta Pbkin8B$  and wt gametocytes  
315 were indistinguishable by DAPI staining: the DNA positive area became enlarged and the intensity  
316 of the signal increased, suggesting that nuclear DNA was replicated in  $\Delta Pbkin8B$  parasites similar to  
317 wt cells, corroborating the FACS results (Fig 3). At the same time, microtubules were assembled in  
318 the cytoplasm, coiled around the enlarged nucleus, though the signal in  $\Delta Pbkin8B$  cells looked less

319 intense than in wt cells (Fig 4). At 15 mpa, the replicated DNA separated into 3-8 ‘clumps’ in wt and  
320 mutant. At this moment, the overall cell shape differed between mutant and wt parasites.  $\Delta Pbkin8B$   
321 microgametocytes remained rounded. Short thin protrusions, labelled with the anti  $\alpha$ -tubulin II  
322 antibody, could be seen in some of these cells (Fig 4), but they did not separate from the  
323 microgametocyte even at 30 mpa. By contrast, at 15 and 30 mpa, exflagellating gametes could be  
324 observed in the wt.  
325 PbKIN8B is therefore involved most likely in axoneme assembly/stabilisation and/or exflagellation.

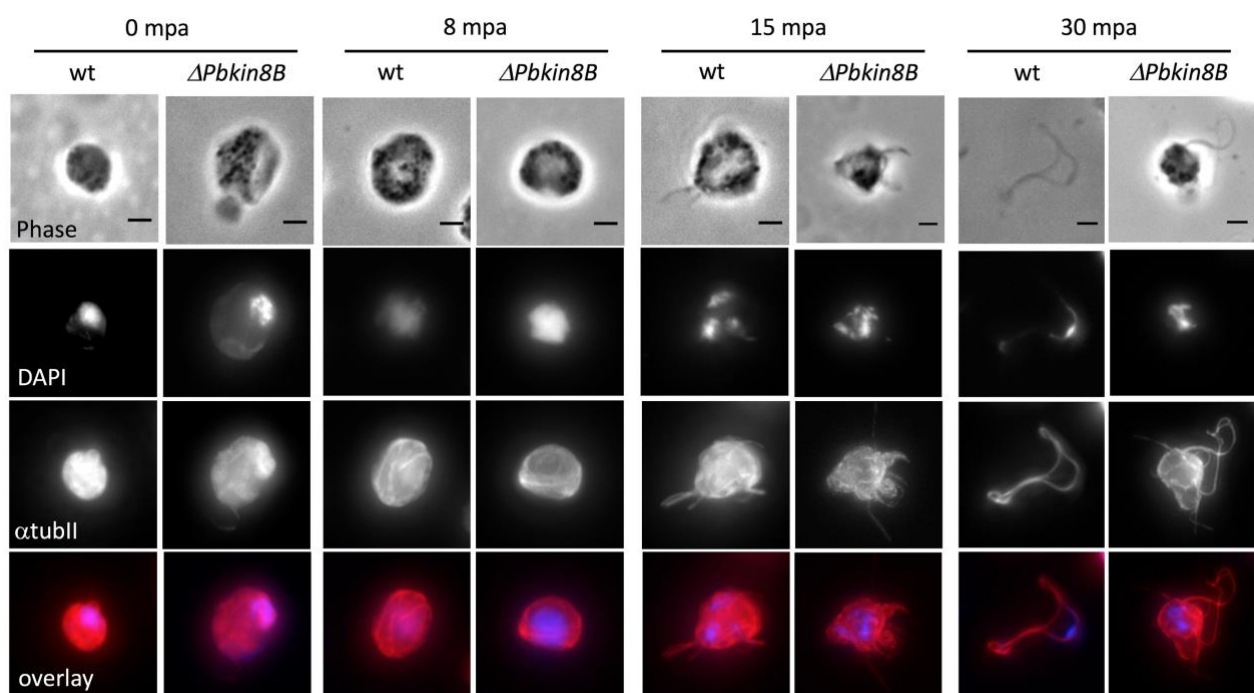

326

327 **Fig 4.  $\Delta Pbkin8B$  parasites are able to replicate DNA and assemble microtubules, but cannot**  
328 **release male gametes.**

329 *Immunofluorescence assay of wt and  $\Delta Pbkin8B$  male gametocytes from beginning of activation to 30 mpa. DAPI staining*  
330 *of DNA is seen in blue and anti- $\alpha$  tubulin II in red. Immunofluorescence images correspond to the maximum intensity*  
331 *projection of the z-series. During the course of activation, wt microgametocytes increase nuclear content and formed*  
332 *microgametes.  $\Delta PbKIN8B$  microgametocytes also replicate DNA and assemble microtubules in the cytoplasm. However,*  
333 *they are not able to release microgametes. Scale bar: 2  $\mu$ m.*

334

335

336

337 **PbKIN8B is essential for axoneme assembly in *Plasmodium***

338 To better understand the phenotype observed by light microscopy, we examined the ultrastructure of  
339 male gametocytes by transmission electron microscopy in wt and  $\Delta Pbkin8B$  cells at 15 and 30 mpa.  
340 At 15 mpa, the gametocytes from wt and  $\Delta Pbkin8B$  have egressed from the RBC and were observed  
341 at various stages of microgametogenesis (Fig 5A-J). The earlier stages of both wt (Fig 5A, G) and  
342 mutant (Fig 5B, H) are characterized by a large spherical central nucleus with dispersed chromatin.  
343 When the cytoplasm was examined, the wt cells presented a number of developing axonemes with  
344 classical 9 doublet microtubules around 2 central microtubules, 9+2 (Fig 5A, C, D). The microtubules  
345 of the axonemes develop from an electron dense basal body and elongate round the periphery of the  
346 microgametocyte (Fig 5A, G, I). In wt, cross section showed that the majority of axonemes were  
347 normal (60%, 9+2 based on 18 randomly selected microgametocytes), but a proportion (40%) showed  
348 varying degrees of abnormality (Table 2). In contrast, in the mutant, examination of a random sample  
349 of 47 microgametocytes failed to identify any complete “9+2” axonemes (Table 2). Organized  
350 interaction between doublet microtubules was rare although numerous doublet and single  
351 microtubules were identified in the cytoplasm (Table 2). Similar to wt, the microtubules in the mutant  
352 appear to grow from electron dense structures (basal bodies) (Fig 5B, H, J). Although difficult to  
353 quantify, there appeared to be fewer basal bodies (0.81 basal bodies per section through wt  
354 microgametocytes compared to 0.43 for mutant (Table 2)) and these appear to have lost their close  
355 connection to the nuclear pole observed in the wt (90% wt to 20% mutant) (Table S3). In cross section,  
356 the microtubules appeared to be randomly distributed in the cytoplasm (Fig 5E, F) but in longitudinal  
357 sections, microtubules still appeared to elongate round the periphery of the gametocyte (Fig 5B, H).  
358 It was possible to identify two single microtubules similarly arranged to the central pair of  
359 microtubules of the axonemes but little evidence of spatial organization of the doublet microtubules  
360 around them was observed (Fig 5F). As the microgametocytes develop (undergo genome replication),  
361 multiple nuclear poles were observed in both the wt and mutant (Fig 5G, H). The organization of



362 nuclear poles was similar in both wt and  $\Delta Pbkin8B$  consisting of an electron dense cone-like structure  
363 from which spindle microtubules radiate with attached kinetochores (insets in Fig 5G, H).

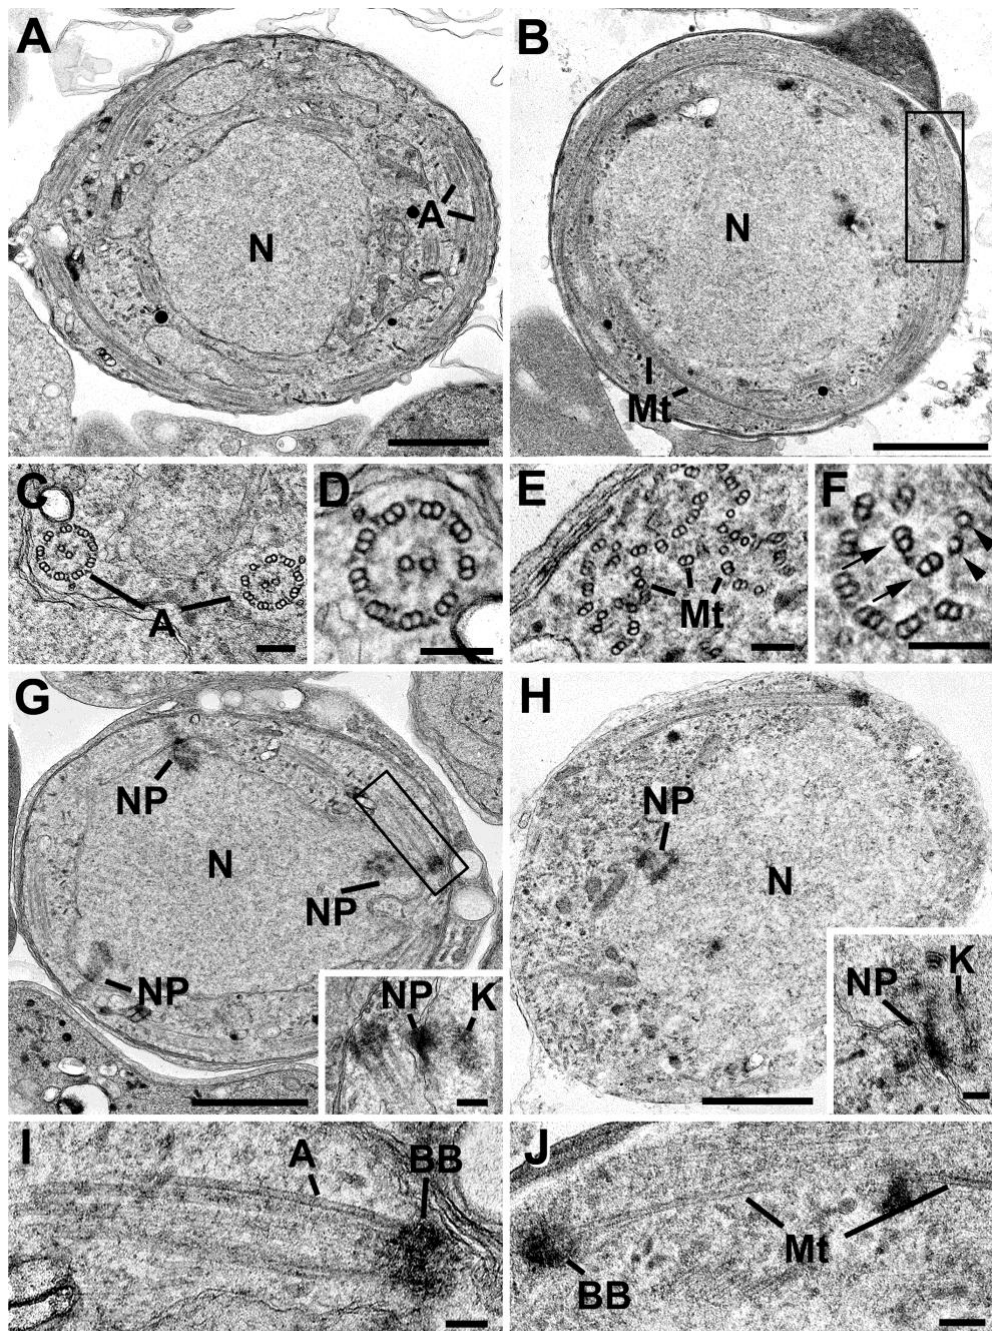

364

365 **Fig 5.  $\Delta Pbkin8B$  microgametocytes display a modified ultrastructure with disorganised**  
366 **axonemes.**

367 *Electron micrographs of various developmental stages of microgametogenesis in wt and  $\Delta Pbkin8B$  parasites at 15 and*  
368 *30 mpa. Bars represent 1 $\mu$ m in A, B, G, H and 100 nm in all other micrographs. A. Low power through a wt*  
369 *microgametocyte showing the central nucleus (N) with a number of axonemes (A) running round the peripheral*  
370 *cytoplasm. B. Low power through a  $\Delta Pbkin8B$  microgametocyte showing the large central nucleus (N) with longitudinally*

371 *running microtubules (Mt). C. Detail of the cytoplasm of wt microgametocyte illustrating cross section through two*  
 372 *axonemes (A). D. Enlargement of an axoneme showing the 9+2 arrangement of the microtubules. E. Detail of the*  
 373 *cytoplasm of a  $\Delta Pbk18B$  gametocyte showing a cross section through a number of randomly distributed microtubules*  
 374 *seen mostly as doublets (Mt). F. Enlargement of a group of microtubules showing two single microtubules (arrowheads)*  
 375 *with randomly distributed doublet microtubules (arrows). G. Low power of a mid-stage wt microgametocyte showing the*  
 376 *central nucleus (N) with a number of nuclear poles (NP). Insert. Detail of a nuclear pole (NP) and radiating microtubules*  
 377 *with attached kinetochore (K). H. Low power of a mid-stage  $\Delta Pbk18B$  gametocyte showing the central nucleus (N) and*  
 378 *associated nuclear pole (NP). Insert. Detail of a nuclear pole (NP) and radiating microtubules with attached kinetochore*  
 379 *(K). I. Detail from the cytoplasm of a wt parasite from the enclosed area g showing a longitudinal section through the*  
 380 *basal body (BB) and axoneme (A).J. Detail from cytoplasm of a  $\Delta Pbk18B$  gametocyte from the enclosed area in b*  
 381 *showing longitudinally running microtubule (Mt) emanating from an electron dense structure, possibly a basal body (BB).*  
 382

383 **Table 2. Quantification of microtubule structures and basal bodies in  $\Delta Pbk18B$  and wt**  
 384 **gametocytes.**

|                 | 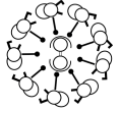 |  |  |  |  |  |  |  | Basal bodies/cell |
|-----------------|------------------------------------------------------------------------------------|------------------------------------------------------------------------------------|------------------------------------------------------------------------------------|------------------------------------------------------------------------------------|------------------------------------------------------------------------------------|-------------------------------------------------------------------------------------|--------------------------------------------------------------------------------------|--------------------------------------------------------------------------------------|-------------------|
| wt              | 58%                                                                                | 6%                                                                                 | 10%                                                                                | 7%                                                                                 | 2%                                                                                 | 12%                                                                                 | 5%                                                                                   | 0%                                                                                   | 0,81              |
| $\Delta Pbk18B$ | 0%                                                                                 | 0%                                                                                 | 0%                                                                                 | 1%                                                                                 | 1%                                                                                 | 6%                                                                                  | 67%                                                                                  | 25%                                                                                  | 0,43              |

385

386 *Arrangement of doublet microtubules in circles, with or without a central pair of microtubules, semi-circles or isolated*  
 387 *doublet, respectively singlet microtubules, were counted in 47  $\Delta Pbk18B$  and 18 wt gametocytes and the results are*  
 388 *presented as percentage of each type. The basal body counts are presented as relative number of basal bodies per cell*  
 389 *observed in random thin sections through microgametocytes based on examination of 27 wt and 23  $\Delta Pbk18B$  cells.*  
 390

391 In the later stages of microgametogenesis, in both the wt and  $\Delta Pbk18B$  cells, there was similar  
 392 chromatin condensation within the nucleus prior to potential exflagellation (Fig 6A, B).  
 393 Exflagellation with a flagellum and associated nucleus protruding from the microgametocyte (Fig  
 394 6C) and free microgametes could be observed in the wt (Fig 6E, F), but no free microgametes were  
 395 seen in the  $\Delta Pbk18B$  samples although very rare examples of cytoplasmic protrusions were identified  
 396 (Fig 6D), which contained disorganized doublet microtubules (Fig 6G)

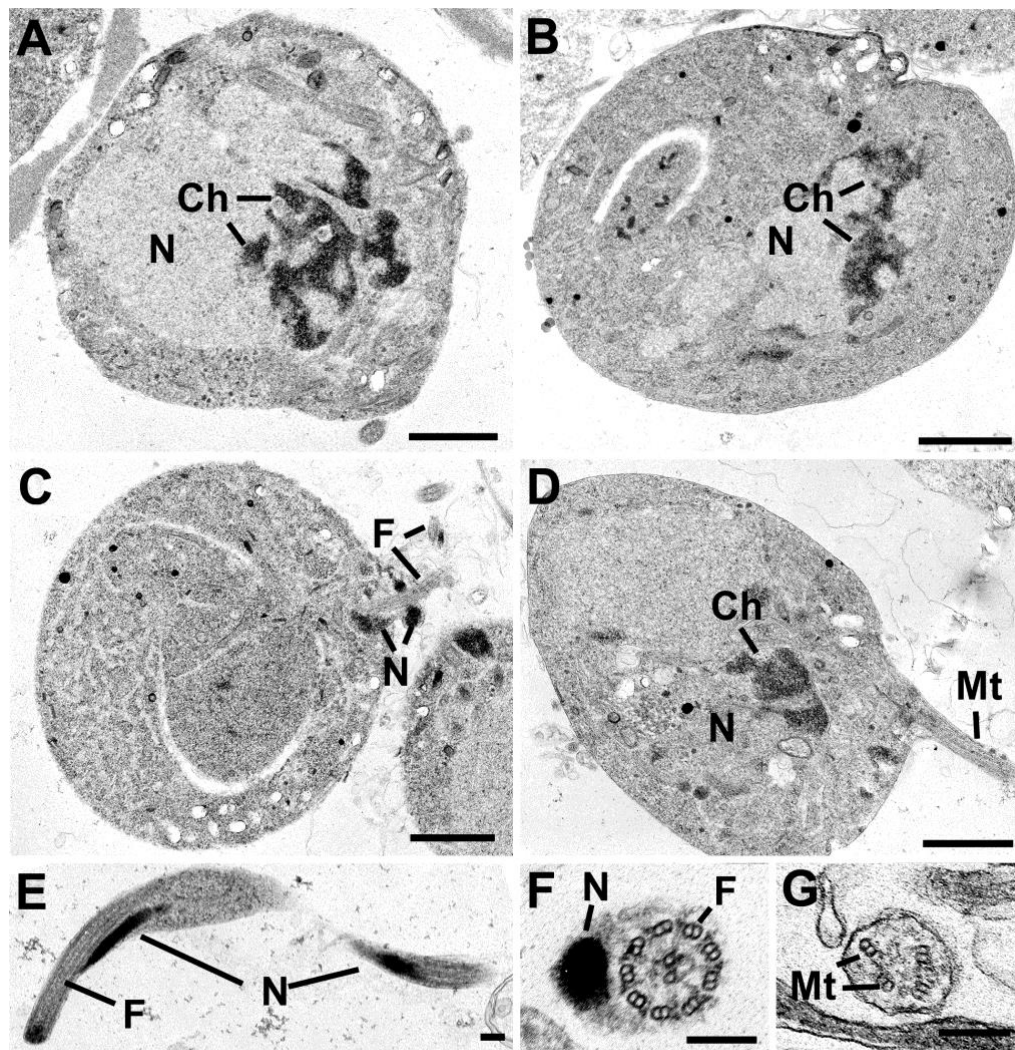

397

398 **Fig 6.  $\Delta Pbkin8B$  microgametocytes condenses chromatin but do not release male gametes.**

399 *Electron micrographs of late developmental stages of microgametogenesis in wt and  $\Delta Pbkin8B$  parasites at 15 and 30*  
400 *mpa. Bars represent 1 $\mu m$  in A, B, C and D and 100 nm in all other micrographs. A. Low power of a late stage wt*  
401 *microgametocyte showing the nucleus (N) with peripherally condensed chromatin (Ch). B. Low power of a late  $\Delta Pbkin8B$*   
402 *gametocyte showing the nucleus with condensed chromatin (Ch). C. Low power of a late microgametocyte undergoing*  
403 *exflagellation with the flagellum (F) and associated nucleus (N) protruding from the surface. D. Low power of a late*  
404  *$\Delta Pbkin8B$  gametocyte showing a centrally located nucleus (N) with condensed chromatin (Ch) and a cytoplasmic process*  
405 *from the surface containing microtubules (Mt). E. Longitudinal section through a free microgamete showing the*  
406 *relationship between the nucleus (N) and the flagellum (F). F. Cross section through a free wt microgamete illustrating*  
407 *the electron dense nucleus (N) and associated flagellum (F). G. Detail of a cross section through a cytoplasmic process*  
408 *from a  $\Delta Pbkin8B$  gametocyte showing disorganized duplet microtubules (Mt).*

409

410 In summary, PbKIN8B does not play a role in genome replication and intranuclear subdivision in  
411 gametogenesis, but it is essential for assembly of structured “9+2” axonemes in the cytoplasm. In the  
412 absence of viable/motile microgametes, parasites are unable to successfully complete their life cycle.

413

## 414 **Discussion**

415

416 We hypothesized that motor proteins, such as kinesins, are essential actors in the dynamic processes  
417 of microgametogenesis in *Plasmodium*. *P. berghei* possesses members of the kinesin families 4, 5, 8,  
418 13, 15 and 20, as well as three kinesins which could not be associated to known families (Wickstead,  
419 Gull, et al., 2010) (Table 1). There is no ortholog of kinesin-4 family member PBANKA\_1208200 in  
420 *P. falciparum*, even though it is functional and important for growth at the asexual stages in *P. berghei*  
421 (Bushell et al., 2017). The restricted number of kinesin encoding genes does not necessarily mean  
422 that *Plasmodium* needs these proteins less than other organisms. Malarial kinesins could have  
423 multiple roles as it has been shown in other organisms (Dawson et al., 2007; Wickstead, Carrington,  
424 Gluenz, & Gull, 2010).

425 According to two transcriptomic studies, all kinesin encoding genes in *P. berghei* are expressed  
426 during the sexual stage (Otto et al., 2014; Yeoh et al., 2017). Proteomic studies identified 3 kinesins  
427 expressed during male gametogenesis (kinesin-8B, -13 and -15) (Khan et al., 2005; Talman et al.,  
428 2014), but no functional studies have been conducted until now. In other eukaryotes, orthologues for  
429 kinesin-4, -5, -8B, -13 and -15 are known to be involved in microtubule dynamics and particularly  
430 mitosis and cilia/flagella length regulation (Almeida & Maiato, 2018; Hu et al., 2015; Ma, Wang, &  
431 Yang, 2017; Muhia et al., 2016; Niwa, 2015; Niwa et al., 2012; Shrestha, Hazelbaker, Yount, &  
432 Walczak, 2018; Singh, Pandey, Al-Bassam, & Gheber, 2018; van Riel et al., 2017). Unfortunately,  
433 concerning PBANKA\_0622400, PBANKA\_0609500, PBANKA\_0809500, PBANKA\_0902400 and  
434 PBANKA\_1224100, no functional data are available and the number of species possessing

435 orthologues of these proteins is currently very limited, making it difficult to construct any hypothesis  
436 concerning their roles.

437 In other eukaryotes, kinesin-8 family members, which share a family-specific helical neck region  
438 (Miki et al., 2005), have been shown to be involved in both mitosis and microtubule regulation in  
439 cilia/flagella. The members of the kinesin-8A subfamily are found in different organisms and their  
440 roles in mitosis, often promoting microtubule catastrophe, have been studied extensively (Dave et al.,  
441 2018; Edzuka & Goshima, 2019; Gergely et al., 2016; Grissom et al., 2009; Messin & Millar, 2014;  
442 Savoian & Glover, 2010; Su et al., 2013). In fission yeast, additional roles involving cell polarity and  
443 control of cortical microtubule length have been shown (Meadows et al., 2018; West, Malmstrom,  
444 Troxell, & McIntosh, 2001). In contrast, members of kinesin-8B subfamily have been poorly studied.  
445 They are restricted to ciliated/flagellated organisms (Wickstead, Gull, et al., 2010), but absent in some  
446 species, like *Drosophila*, *Trypanosoma* or *Chlamydomonas*, inferring a particular flagellar role for  
447 these proteins. The functional information arises from the mammalian orthologue, KIF19A, localized  
448 at the ciliary tip. HsKIF19A plays a role in controlling microtubule length in cilia and its absence  
449 results in the formation of abnormally long cilia, causing hydrocephaly and female infertility in mice  
450 (Niwa et al., 2012).

451 *Plasmodium* possesses 2 members of the kinesin-8 family: PbKIN8B and KIN8X  
452 (PBANKA\_0805900, belonging to neither the KIN8A nor the KIN8B subfamily (Wickstead, Gull,  
453 & Richards, 2010). Recently, Zeeshan et al. (2019) showed that KIN8X is localized at the mitotic  
454 spindle during cell division and that it fulfils an essential role in the parasite life cycle (Zeeshan,  
455 Shilliday, et al., 2019). Only PbKIN8B is specifically expressed in male gametocytes and gametes  
456 (Khan et al., 2005; Talman et al., 2014). We hypothesised that PbKIN8B could play multiple roles in  
457 microgametogenesis, either in mitosis and/or axoneme construction.

458 If PbKIN8B was involved in mitosis, a nuclear localization of the protein, as well as defects in DNA  
459 replication in its absence, might have been expected. In *Plasmodium*, as opposed to metazoan  
460 eukaryotes, the nuclear envelope never breaks down. Cytoplasmic kinesins therefore never get access

461 to the spindle during mitosis, and nuclear vs. cytoplasmic location is critical. A nuclear localisation  
462 signal could not be predicted in the PbKIN8B sequence. This is in agreement with the IFA data  
463 showing that PbKIN8B is excluded from the nucleus. Moreover, in the absence of PbKIN8B, DNA  
464 replication and spindle activity occur normally in microgametes and asexual blood stage parasites. A  
465 mitotic role of PbKIN8B during other life stages where mitosis also occurs, such as sporozoite  
466 formation and/or liver-stage development, whilst not anticipated, cannot be completely excluded.  
467 Unfortunately, no data are available on the expression of PbKIN8B in these stages.

468 Looking at the different steps in male gametogenesis, we have shown that mutant  $\Delta Pbkin8B$   
469 microgametocytes are able to egress from the red blood cell, a step which is independent from DNA  
470 replication and axoneme motility (Tewari, Dorin, Moon, Doerig, & Billker, 2005). The absence of  
471 PbKIN8B causes severe defects in axonemal assembly. While numerous singlet and doublet  
472 microtubules are present in the cytoplasm, they are never organised into “9+2” axonemes. *In vivo*,  
473 PbKIN8B is essential for completion of the parasite life cycle.

474 Several hypotheses for the role of PbKIN8B can be envisaged.

475 1) The absence of PbKIN8B could cause defects at the level of the basal body, at the very beginning  
476 of the construction of the axoneme. Our IFA data show that PbKIN8B is present along the length of  
477 the axoneme, but we cannot exclude its presence already at the basal body. In *Plasmodium* and other  
478 apicomplexans such as *Toxoplasma*, the basal body appears as an amorphous electron dense structure  
479 in which only rarely a substructure composed of 9 singlet microtubules can be identified (Francia et  
480 al., 2015; Sinden et al., 1976). Due to the difficulty in resolving the substructure of the basal body it  
481 is impossible to comment on structural changes resulting from the absence of Pbkin8B. However,  
482 close observation of basal bodies and associated structures showed that fewer basal bodies can be  
483 observed in the mutant and those present have lost their tight association with nuclear poles (Table  
484 S3). Furthermore, it has been recently shown *in vitro* that, under certain conditions, B-microtubules  
485 can nucleate on A-microtubules, resulting in a doublet microtubules even in absence of a basal body  
486 (Schmidt-Cernohorska et al., 2019). Thus, even in the  $\Delta PbKIN8$  mutant, singlet and doublet

487 microtubules could potentially assemble without a functional basal body, as observed in the basal  
488 body mutant *Δsas-6* (Marques et al., 2015).

489 Interestingly, a default of cytoplasmic microtubules assembly, similar to the one observed in  
490 *ΔPbKIN8*, has been described after treatment of *P. berghei* gametocytes with azadirachtin, a plant  
491 limnoid and insecticide affecting male gametogenesis in *Plasmodium* (Billker et al., 2002). The  
492 authors suggest that azadirachtin would interact directly or indirectly with cytoplasmic components  
493 of the microtubule organizing center on the face of the spindle plaque, thereby disrupting both  
494 cytoplasmic microtubule patterning and the separation/rotation of the nuclear spindle poles at the  
495 prometaphase (Billker et al., 2002).

496 2) Assuming the basal bodies seen in the knockout mutant are functional and able to sustain the  
497 elongation of axonemal microtubules, the problem could lie in the stability of the assembled axoneme.  
498 As the axoneme grows, the abnormalities due to the absence of PbKIN8B cause the disruption of the  
499 connections between elements leading to a fatal dislocation of the structure. Several factors could  
500 exacerbate the instability:

501 First, coordinated activity of axonemal dyneins, located on the doublet microtubules causes sliding  
502 of microtubules during axonemal bending (for a recent review (Viswanadha, Sale, & Porter, 2017)).  
503 However, in *Plasmodium* fully formed axonemes start beating only seconds before exflagellation,  
504 limiting the sliding effect on the stability of the structure (Sinden & Croll, 1975).

505 Second, encasement of axonemes built on cellular protrusions enclosed in a membrane, as is the case  
506 in most eukaryotes, could stabilize the structure. This sheath is absent in *Plasmodium* due to its  
507 intracytoplasmic mode of assembly.

508 Third, *Plasmodium* operates with a reduced set of proteins for assembly and functioning of the  
509 axoneme. This structure, while fast to assemble in the cytoplasm, may be more susceptible to  
510 dislocation when just one component is missing.

511 On the other hand, PbKIN8B could play an indirect role and interact with various partners.  
512 Unfortunately, the small number of proteins involved in *Plasmodium* male gametogenesis identified

513 and the absence of conservation of PbKIN8B in the most commonly used model organisms render  
514 the identification of putative partners difficult.

515 KIN8B could transport elements necessary for assembly or stabilization of the axoneme, that could  
516 be other motor proteins. In *Saccharomyces pombe*, the active kinesin-8 is a heterodimeric complex  
517 formed by KLP5 and KLP6 (Garcia, et al, 2002; Unsworth et al, 2008; West, et al, 2002). KIN8B in  
518 *P. berghei* displays several coiled-coil motifs adjacent to the motor domain, which could be involved  
519 in oligomerization.

520 PbKIN8B could also interact with one or several axonemal proteins among several motor proteins  
521 (as dyneins and kinesins, among which are kinesin-13 and -15, expressed in male gametogenesis)  
522 (Szklarczyk et al., 2015) (Invergo et al., 2017).

523 The phenotype observed in  $\Delta Pbkin8B$  resembles strongly the one of the basal body mutant  $\Delta sas-6$ ,  
524 this protein – or another basal body protein – could therefore be a possible partner of PbKIN8B. This  
525 would be coherent with the IFA localization observed for *Pbkin8B-gfp*.

526 A concomitant study by Zeeshan et al., deposited on BioXriv, following the original submission of  
527 this paper, confirmed the localisation of PbKIN8B with the basal bodies and the axoneme,  
528 establishing a role of PbKIN8B in the basal body function (Zeeshan, Ferguson, et al., 2019). However,  
529 other roles in gametogenesis, which would explain the localisation of KIN8B, along the length of the  
530 axoneme, cannot be excluded. The lack of information on molecular actors involved in gametogenesis  
531 coupled to a complex and original system of axoneme assembly and gamete production, renders the  
532 attribution of partners to PbKIN8B complicated and future studies are necessary to dissect this crucial  
533 step in the parasite life cycle.

534 We present here the first characterization of kinesin 8B (PbKIN8B) involved in male gametogenesis  
535 in *P. berghei*. This study illustrates the importance of molecular motors in *Plasmodium* and shows  
536 that the absence of this kinesin causes severe defects that impede completion of the life cycle. Taken  
537 together, our results not only illustrate a previously unknown role for PbKIN8B in male  
538 gametogenesis, but also provide new insights into flagellar organization and function in *Plasmodium*.



539 **Experimental procedures**

540 **Ethics statement**

541 All animal work was carried out in accordance with the European regulations and in compliance with  
542 the French guidelines and regulations. The project was approved by the Ethic Committee CUVIER  
543 (authorization n°68-007).

544

545 **Generation of transgenic parasites**

546 A pyrimethamine-sensitive clone of *P. berghei* NK65 strain (kindly provided by R. Ménard, Pasteur  
547 Institute, France) was used throughout this study to infect mice as described by Janse and  
548 collaborators (de Koning-Ward et al., 2000). *P. berghei* was maintained by cyclic passage in 4 to 6  
549 weeks old female Swiss OF1 (Janvier labs, France). The *Pbkin8B-gfp* plasmid was generated by  
550 amplifying the final portion of the PbKIN8B coding sequence [nt1978-nt4378] with primers 111 and  
551 112b (S1 Table). A unique restriction site for SacII in the middle of this region was used for single  
552 digestion and single crossover (vertical bar Fig S1A). The construct was inserted into the vector  
553 pI0016 (MRA-785 (BEI Resources)). The stop codon was removed and the gfp coding sequence was  
554 fused in-frame to the coding sequence. The plasmid also contained the *T. gondii* dhfr/ts resistance  
555 marker conveying resistance to pyrimethamine (Franke-Fayard et al., 2004). For PbKIN8B  
556 replacement ( $\Delta Pbkin8B$  lines), the transfection vector was sourced from the Sanger Institute  
557 (PbGEM-267699) (Schwach et al., 2015) and linearized by NotI prior to transfection. Details on  
558 tagging and knockout of PBANKA\_020270 production are shown in Figs S1 and S2. Transfections  
559 were performed as described previously (Janse, Ramesar, & Waters, 2006). Following drug selection,  
560 two independent clonal populations of each genetic background resulting from two independent  
561 transfections were selected by limiting dilution and subsequent genotyping. Transfection experiments  
562 for gene disruption and gene tagging strategies were done in duplicate on different days using  
563 different batches of material.

564

## 565 **Genotypic analysis of mutants**

566 The genotypes of *Pbkin8B-gfp* and  $\Delta$ *Pbkin8B* parasites were analysed by PCR with specific primers  
567 (Figs S1 and S2, Table S1). Briefly, for the C-terminal fusion *Pbkin8B-gfp* tagged parasites,  
568 integration was verified using primer 109 upstream of the amplified region and primer 115 in the  
569 *Pbkin8B-gfp* construct. Primers 53 and 54 served to confirm the presence of the resistance cassette.  
570 For the gene knockout parasites, two diagnostic PCR reactions were used as shown in Fig S2.  
571 Amplification by primers GT and GW2 was used to determine successful integration of the selectable  
572 marker at the targeted locus whereas primers QCR1 and QCR2 were used to verify deletion of the  
573 gene (S1 Table).

574

## 575 **Gametocyte preparation, exflagellation assays and ookinete conversion rates**

576 Preparation of *P. berghei* gametocytes was realized as described previously (Beetsma, van de Wiel,  
577 Sauerwein, & Eling, 1998). Briefly, mice were injected intraperitoneally with 0.1 ml of 25 mg/l  
578 phenylhydrazine (to induce hyper-reticulocytosis) two days prior to infection by  $10^7$  parasites. To  
579 reduce asexual parasitaemia, mice received sulfadiazine (10 mg/L) in their drinking water from day  
580 5 to 7 after infection. On day seven, gametocyte-infected blood was collected for direct exflagellation  
581 assays or gametocyte purification before immunofluorescence assays, electron microscopy  
582 experiments or cytometry measurements as described by Billker *et al.* (Billker *et al.*, 2004). After  
583 collection of whole blood on heparin, white blood cells were removed on CF11 cellulose (Whatman)  
584 columns. Gametocytes were separated from uninfected erythrocytes on a Nycodenz cushion made up  
585 from 48% Nycodenz stock (27.6% w/v Nycodenz in 5.0 mM Tris-HCl pH 7.2, 3.0 mM KCl, 0.3 mM  
586 EDTA) and RPMI1640 medium containing 25 mM HEPES (Sigma), 5% FCS, 4 mM sodium  
587 bicarbonate, pH 7.3. Gametocytes were harvested from the interface and washed three times in the  
588 appropriate buffer for the subsequent protocol. All manipulations were carried out at 19–22°C.  
589 Mature male and female gametocytes can be differentiated by gametocyte pigmentation following  
590 Giemsa staining (males appear blue and females pink).

591 For exflagellation assays, blood was diluted in 10 volumes of exflagellation medium (100  $\mu$ M  
592 xanthurenic acid (XA) (Sigma) in RPMI 1640 (Thermo Fisher Scientific), pH 7.4). The actively  
593 moving gametes interacting with neighbouring RBC (exflagellation centres) were recorded 20  
594 minutes post activation (mpa) by phase contrast microscopy in 10 x 1mm<sup>2</sup> Malassez squares using a  
595 40 $\times$  objective. The number of exflagellation centres was then expressed relative to 100 male  
596 gametocytes for each sample. To perform the ookinete conversion assay, blood was first mixed at a  
597 1:1 ratio in ookinete medium (RPMI pH8, 10% foetal calf serum, 100  $\mu$ M XA). After 24 h to allow  
598 completion of gametogenesis and fertilization, ookinete conversion assays were performed as  
599 previously described (Tewari et al., 2005) by incubating samples with monoclonal antibody 13.1  
600 (antibody against Pb28), conjugated with Cy3. The conversion rate corresponds to the proportion of  
601 ookinetes to all 13.1-positive cells (unfertilized macrogametes and ookinetes). Experiments were  
602 realized in biological triplicates.

603

#### 604 **Western blotting**

605 Asexual stages and gametocytes were isolated as described above. After the addition of Laemmli  
606 sample buffer, the samples were boiled and equal quantities of total protein were loaded on a 7 %  
607 SDS-polyacrylamide gel, before transfer to a nitrocellulose membrane (Thermo Fisher). Western blot  
608 analysis of *Pbkin8B-gfp* was performed under reducing conditions, using an anti-gfp rabbit antibody  
609 (1/3000, Abcam) coupled to an alkaline phosphatase conjugated goat anti-rabbit globulin (1/5000,  
610 Thermo Fisher).

611

#### 612 **Mosquito infection**

613 For mosquito infections, 3- to 8-day-old female adult *A. stephensi* mosquitoes were raised as  
614 previously described (Dimopoulos, Seeley, Wolf, & Kafatos, 1998). Day 3 post mouse-infection,  
615 mosquitoes were allowed to feed on anaesthetized infected mice for 20 min (Rodriguez et al., 2002;  
616 Sinden, Butcher, & Beetsma, 2002). Mosquitoes which had not fed, were discarded.

617 Engorged mosquitoes were dissected at day 8 or day 12 post feeding and the number of oocysts  
618 counted. For bite-back experiments, mosquitoes were infected with wild type or *ΔPbkin8B* parasites  
619 and after 21 days, 6- to 8-week-old female Tucks Ordinary mice were infected by the bite of these  
620 mosquitoes. After 5 days, parasitaemia was determined on mouse blood by blood smears and Giemsa  
621 staining and was followed for 14 days for mice infected by *ΔPbkin8B* parasites. All experiments were  
622 realized in duplicate. Differences between groups were calculated with Fisher's exact test for  
623 prevalence and Mann-Whitney test for intensity.

624

### 625 **Indirect immunofluorescence assay (IFA)**

626 Purified gametocytes were fixed at different time points in 3.7% (v/v) formaldehyde overnight at 4°C  
627 and processed as described previously (Becker et al., 2010). After a brief wash in PBS, cells were  
628 allowed to adhere onto poly-L-lysine coated slides and were then permeabilized by 0.5% (v/v) NP40  
629 in PBS for 15 min. After a 30 minute saturation step, slides were incubated for 2 h with the first  
630 antisera (diluted 1/1000 for rabbit anti  $\alpha$ -tubulin II, 1/2000 for rabbit anti-GFP, 1/200 for rabbit anti-  
631 spectrin, non-diluted for mouse TAT1 (Woods et al., 1989) followed by three washes before  
632 incubation for 1 h with appropriate fluorescently labelled secondary antibodies (Alexa Fluor®488  
633 goat anti-mouse IgG (H+L), Alexa Fluor® 568 goat anti-rabbit IgG (H+L) both diluted 1/300  
634 (Invitrogen)). After a 5 min DAPI incubation (5 microgram/ml), followed by a final wash, slides were  
635 mounted in Vectashield (Vector Laboratories). Parasites were visualized on a Nikon Eclipse TE 300  
636 DV inverted microscope with a 100x oil objective mounted on a piezo electric device using  
637 appropriate fluorescence emission filters. Image acquisition (z-series) was performed with a back  
638 illuminated cooled detector (Photometrics CoolSnap HQ, 12 bit, RoperScientific, France) using a  
639 0.20  $\mu$ m step. Image processing was performed using Image J software (<http://rsb.info.nih.gov/ij/>).

640

### 641 **Electron microscopy**

642 Gametocyte samples (described above) were fixed 15 and 30 mpa in 2.5% glutaraldehyde in 0.1 M  
643 phosphate buffer and processed for electron microscopy as previously described (Ferguson et al.,  
644 2005). Briefly, samples were post fixed in 1% osmium tetroxide, treated en bloc with 2 % uranyl  
645 acetate, dehydrated and embedded in epoxy resin. Thin sections were stained with uranyl acetate and  
646 lead citrate prior to examination in a JEOL1200EX electron microscope (Jeol UK Ltd).

647

#### 648 **Flow cytometry**

649 To measure the nuclear DNA content of activated gametocytes (wt, *ΔPbkin8B* and *Δcdpk4* - a mutant  
650 viable in blood infection that does not undergo DNA replication during microgametogenesis (Billker  
651 et al., 2004)) by flow cytometry, purified gametocytes were transferred into ookinete culture medium  
652 for activation of gamete formation. At 0, 8 and 15 mpa, cells were fixed overnight at 4°C in 0.04%  
653 glutaraldehyde. Blood of naïve mice was fixed in the same conditions and used as a negative control.  
654 DNA was stained with YOYO-1 (Bouillon, Gorgette, Mercereau-Puijalon, & Barale, 2013). Briefly,  
655 gametocytes and blood samples were treated for 10 minutes with 0.25% TritonX100 in PBS after  
656 centrifugation at 100g for 5 minutes. They were then treated with 0.05 mg/ml RNase A/T1 (Thermo  
657 Scientific™) for 4 h at 37°C. Finally, DNA was stained with 10.24 μM YOYO-1 (Invitrogen™). A  
658 gametocyte sample was duplicated for an unstained control. After overnight incubation at 4°C, the  
659 supernatant was replaced by FACSFlow solution and flow cytometry data acquired on a FACSVerse  
660 (BD Biosciences). Data processing and analysis were performed using the FACSuite Software v 1.0.5  
661 (BD Biosciences). YOYO-1 fluorescence was excited with a blue laser (20 mW) at 488 nm and the  
662 signal was detected at 527 +/-16 nm. Quality control based on FSC-A vs SSC-A and FSC-H vs FSC-  
663 A gating was applied to remove debris and doublets respectively. Then, histograms of YOYO-1-A  
664 signal (in log scale) were analysed to determine nucleic acid content. Gates were established resulting  
665 in populations P1 corresponding to the complete YOYO+ population, P2 composed of cells with the  
666 lowest DNA content, and P3, corresponding to cells with the highest DNA content. For each sample

667 the FACS profile was established and the ratio of populations (P2 and P3) was expressed as a  
668 percentage of P1.

669

670

## 671 **Acknowledgements**

672 We wish to thank Joy Alonso and Nathalie Dogna for animal care, Elisabeth Mouray, Lisy  
673 Raveendran and Cyril Willig (CeMIM Platform of the MNHN) for technical help and Philippe Bastin  
674 (Institut Pasteur, Paris) for critical reading of the manuscript and helpful discussions.

675 This project was funded by ATM from Muséum National d'Histoire Naturelle, Paris.

676

677

678 **REFERENCES**

- 679 Almeida, A. C., & Maiato, H. (2018). Chromokinesins. *Curr Biol*, 28(19), R1131-R1135.  
680 doi:10.1016/j.cub.2018.07.017
- 681 Becker, C. A., Malandrin, L., Depoix, D., Larcher, T., David, P. H., Chauvin, A., . . . Bonnet, S. (2010).  
682 Identification of three CCp genes in *Babesia divergens*: novel markers for sexual stages parasites. *Mol*  
683 *Biochem Parasitol*, 174(1), 36-43. doi:10.1016/j.molbiopara.2010.06.011
- 684 Beetsma, A. L., van de Wiel, T. J., Sauerwein, R. W., & Eling, W. M. (1998). *Plasmodium berghei* ANKA:  
685 purification of large numbers of infectious gametocytes. *Exp Parasitol*, 88(1), 69-72.  
686 doi:10.1006/expr.1998.4203
- 687 Bennink, S., Kiesow, M. J., & Pradel, G. (2016). The development of malaria parasites in the mosquito midgut.  
688 *Cell Microbiol*, 18(7), 905-918. doi:10.1111/cmi.12604
- 689 Billker, O., Dechamps, S., Tewari, R., Wenig, G., Franke-Fayard, B., & Brinkmann, V. (2004). Calcium and a  
690 calcium-dependent protein kinase regulate gamete formation and mosquito transmission in a  
691 malaria parasite. *Cell*, 117(4), 503-514.
- 692 Billker, O., Lindo, V., Panico, M., Etienne, A. E., Paxton, T., Dell, A., . . . Morris, H. R. (1998). Identification of  
693 xanthurenic acid as the putative inducer of malaria development in the mosquito. *Nature*, 392(6673),  
694 289-292. doi:10.1038/32667
- 695 Billker, O., Shaw, M. K., Jones, I. W., Ley, S. V., Mordue, A. J., & Sinden, R. E. (2002). Azadirachtin disrupts  
696 formation of organised microtubule arrays during microgametogenesis of *Plasmodium berghei*. *J*  
697 *Eukaryot Microbiol*, 49(6), 489-497.
- 698 Bouillon, A., Gorgette, O., Mercereau-Puijalon, O., & Barale, J. C. (2013). Screening and evaluation of  
699 inhibitors of *Plasmodium falciparum* merozoite egress and invasion using cytometry. *Methods Mol*  
700 *Biol*, 923, 523-534. doi:10.1007/978-1-62703-026-7\_36
- 701 Bushell, E., Gomes, A. R., Sanderson, T., Anar, B., Girling, G., Herd, C., . . . Billker, O. (2017). Functional Profiling  
702 of a *Plasmodium* Genome Reveals an Abundance of Essential Genes. *Cell*, 170(2), 260-272 e268.  
703 doi:10.1016/j.cell.2017.06.030
- 704 Churcher, T. S., Sinden, R. E., Edwards, N. J., Poulton, I. D., Rampling, T. W., Brock, P. M., . . . Blagborough, A.  
705 M. (2017). Probability of Transmission of Malaria from Mosquito to Human Is Regulated by Mosquito  
706 Parasite Density in Naive and Vaccinated Hosts. *PLoS Pathog*, 13(1), e1006108.  
707 doi:10.1371/journal.ppat.1006108
- 708 Dave, S., Anderson, S. J., Sinha Roy, P., Nsamba, E. T., Bunning, A. R., Fukuda, Y., & Gupta, M. L., Jr. (2018).  
709 Discrete regions of the kinesin-8 Kip3 tail differentially mediate astral microtubule stability and  
710 spindle disassembly. *Mol Biol Cell*, 29(15), 1866-1877. doi:10.1091/mbc.E18-03-0199
- 711 Dawson, S. C., Sagolla, M. S., Mancuso, J. J., Woessner, D. J., House, S. A., Fritz-Laylin, L., & Cande, W. Z.  
712 (2007). Kinesin-13 regulates flagellar, interphase, and mitotic microtubule dynamics in *Giardia*  
713 *intestinalis*. *Eukaryot Cell*, 6(12), 2354-2364. doi:10.1128/EC.00128-07
- 714 de Koning-Ward, T. F., Fidock, D. A., Thathy, V., Menard, R., van Spaendonk, R. M., Waters, A. P., & Janse, C.  
715 J. (2000). The selectable marker human dihydrofolate reductase enables sequential genetic  
716 manipulation of the *Plasmodium berghei* genome. *Mol Biochem Parasitol*, 106(2), 199-212.
- 717 Dimopoulos, G., Seeley, D., Wolf, A., & Kafatos, F. C. (1998). Malaria infection of the mosquito *Anopheles*  
718 *gambiae* activates immune-responsive genes during critical transition stages of the parasite life cycle.  
719 *EMBO J*, 17(21), 6115-6123. doi:10.1093/emboj/17.21.6115
- 720 Edzuka, T., & Goshima, G. (2019). *Drosophila* kinesin-8 stabilizes the kinetochore-microtubule interaction. *J*  
721 *Cell Biol*, 218(2), 474-488. doi:10.1083/jcb.201807077
- 722 Ferguson, D. J., Henriquez, F. L., Kirisits, M. J., Muench, S. P., Prigge, S. T., Rice, D. W., . . . McLeod, R. L. (2005).  
723 Maternal inheritance and stage-specific variation of the apicoplast in *Toxoplasma gondii* during  
724 development in the intermediate and definitive host. *Eukaryot Cell*, 4(4), 814-826.  
725 doi:10.1128/EC.4.4.814-826.2005
- 726 Filarsky, M., Frasncka, S. A., Niederwieser, I., Brancucci, N. M. B., Carrington, E., Carrio, E., . . . Voss, T. S.  
727 (2018). GDV1 induces sexual commitment of malaria parasites by antagonizing HP1-dependent gene  
728 silencing. *Science*, 359(6381), 1259-1263. doi:10.1126/science.aan6042

- 729 Francia, M. E., Dubremetz, J. F., & Morrissette, N. S. (2015). Basal body structure and composition in the  
730 apicomplexans *Toxoplasma* and *Plasmodium*. *Cilia*, 5, 3. doi:10.1186/s13630-016-0025-5
- 731 Franke-Fayard, B., Trueman, H., Ramesar, J., Mendoza, J., van der Keur, M., van der Linden, R., . . . Janse, C.  
732 J. (2004). A *Plasmodium berghei* reference line that constitutively expresses GFP at a high level  
733 throughout the complete life cycle. *Mol Biochem Parasitol*, 137(1), 23-33.  
734 doi:10.1016/j.molbiopara.2004.04.007
- 735 Garcia, C. H. S., Depoix, D., Queiroz, R. M. L., Souza, J. M. F., Fontes, W., de Sousa, M. V., . . . Charneau, S.  
736 (2018). Dynamic molecular events associated to *Plasmodium berghei* gametogenesis through  
737 proteomic approach. *J Proteomics*, 180, 88-98. doi:10.1016/j.jprot.2017.11.009
- 738 Garcia, M. A., Koonrugsa, N., & Toda, T. (2002). Two kinesin-like Kin I family proteins in fission yeast regulate  
739 the establishment of metaphase and the onset of anaphase A. *Curr Biol*, 12(8), 610-621.
- 740 Gergely, Z. R., Crapo, A., Hough, L. E., McIntosh, J. R., & Betterton, M. D. (2016). Kinesin-8 effects on mitotic  
741 microtubule dynamics contribute to spindle function in fission yeast. *Mol Biol Cell*, 27(22), 3490-3514.  
742 doi:10.1091/mbc.E15-07-0505
- 743 Grissom, P. M., Fiedler, T., Grishchuk, E. L., Nicastro, D., West, R. R., & McIntosh, J. R. (2009). Kinesin-8 from  
744 fission yeast: a heterodimeric, plus-end-directed motor that can couple microtubule  
745 depolymerization to cargo movement. *Mol Biol Cell*, 20(3), 963-972. doi:10.1091/mbc.E08-09-0979
- 746 Gupta, M. L., Jr., Carvalho, P., Roof, D. M., & Pellman, D. (2006). Plus end-specific depolymerase activity of  
747 Kip3, a kinesin-8 protein, explains its role in positioning the yeast mitotic spindle. *Nat Cell Biol*, 8(9),  
748 913-923. doi:10.1038/ncb1457
- 749 Hu, Z., Liang, Y., Meng, D., Wang, L., & Pan, J. (2015). Microtubule-depolymerizing kinesins in the regulation  
750 of assembly, disassembly, and length of cilia and flagella. *Int Rev Cell Mol Biol*, 317, 241-265.  
751 doi:10.1016/bs.ircmb.2015.01.008
- 752 Invergo, B. M., Brochet, M., Yu, L., Choudhary, J., Beltrao, P., & Billker, O. (2017). Sub-minute  
753 Phosphoregulation of Cell Cycle Systems during *Plasmodium* Gamete Formation. *Cell Rep*, 21(7),  
754 2017-2029. doi:10.1016/j.celrep.2017.10.071
- 755 Ishikawa, T. (2017). Axoneme Structure from Motile Cilia. *Cold Spring Harb Perspect Biol*, 9(1).  
756 doi:10.1101/cshperspect.a028076
- 757 Janse, C. J., Ramesar, J., & Waters, A. P. (2006). High-efficiency transfection and drug selection of genetically  
758 transformed blood stages of the rodent malaria parasite *Plasmodium berghei*. *Nat Protoc*, 1(1), 346-  
759 356. doi:10.1038/nprot.2006.53
- 760 Kafsack, B. F., Rovira-Graells, N., Clark, T. G., Bancells, C., Crowley, V. M., Campino, S. G., . . . Llinas, M. (2014).  
761 A transcriptional switch underlies commitment to sexual development in malaria parasites. *Nature*,  
762 507(7491), 248-252. doi:10.1038/nature12920
- 763 Kent, R. S., Modrzynska, K. K., Cameron, R., Philip, N., Billker, O., & Waters, A. P. (2018). Inducible  
764 developmental reprogramming redefines commitment to sexual development in the malaria  
765 parasite *Plasmodium berghei*. *Nat Microbiol*, 3(11), 1206-1213. doi:10.1038/s41564-018-0223-6
- 766 Khan, S. M., Franke-Fayard, B., Mair, G. R., Lasonder, E., Janse, C. J., Mann, M., & Waters, A. P. (2005).  
767 Proteome analysis of separated male and female gametocytes reveals novel sex-specific *Plasmodium*  
768 biology. *Cell*, 121(5), 675-687. doi:10.1016/j.cell.2005.03.027
- 769 Kooij, T. W., Franke-Fayard, B., Renz, J., Kroeze, H., van Dooren, M. W., Ramesar, J., . . . Waters, A. P. (2005).  
770 *Plasmodium berghei* alpha-tubulin II: a role in both male gamete formation and asexual blood stages.  
771 *Mol Biochem Parasitol*, 144(1), 16-26. doi:10.1016/j.molbiopara.2005.07.003
- 772 Ma, D. D., Wang, D. H., & Yang, W. X. (2017). Kinesins in spermatogenesis. *Biol Reprod*, 96(2), 267-276.  
773 doi:10.1095/biolreprod.116.144113
- 774 Marques, S. R., Ramakrishnan, C., Carzaniga, R., Blagborough, A. M., Delves, M. J., Talman, A. M., & Sinden,  
775 R. E. (2015). An essential role of the basal body protein SAS-6 in *Plasmodium* male gamete  
776 development and malaria transmission. *Cell Microbiol*, 17(2), 191-206. doi:10.1111/cmi.12355
- 777 McHugh, T., Gluszek, A. A., & Welburn, J. P. I. (2018). Microtubule end tethering of a processive kinesin-8  
778 motor Kif18b is required for spindle positioning. *J Cell Biol*, 217(7), 2403-2416.  
779 doi:10.1083/jcb.201705209



- 780 Meadows, J. C., Messin, L. J., Kamnev, A., Lancaster, T. C., Balasubramanian, M. K., Cross, R. A., & Millar, J. B.  
781 (2018). Opposing kinesin complexes queue at plus tips to ensure microtubule catastrophe at cell  
782 ends. *EMBO Rep*, *19*(11). doi:10.15252/embr.201846196
- 783 Messin, L. J., & Millar, J. B. (2014). Role and regulation of kinesin-8 motors through the cell cycle. *Syst Synth*  
784 *Biol*, *8*(3), 205-213. doi:10.1007/s11693-014-9140-z
- 785 Miki, H., Okada, Y., & Hirokawa, N. (2005). Analysis of the kinesin superfamily: insights into structure and  
786 function. *Trends Cell Biol*, *15*(9), 467-476. doi:10.1016/j.tcb.2005.07.006
- 787 Muhia, M., Thies, E., Labonte, D., Ghiretti, A. E., Gromova, K. V., Xompero, F., . . . Kneussel, M. (2016). The  
788 Kinesin KIF21B Regulates Microtubule Dynamics and Is Essential for Neuronal Morphology, Synapse  
789 Function, and Learning and Memory. *Cell Rep*, *15*(5), 968-977. doi:10.1016/j.celrep.2016.03.086
- 790 Niwa, S. (2015). Kinesin superfamily proteins and the regulation of microtubule dynamics in morphogenesis.  
791 *Anat Sci Int*, *90*(1), 1-6. doi:10.1007/s12565-014-0259-5
- 792 Niwa, S., Nakajima, K., Miki, H., Minato, Y., Wang, D., & Hirokawa, N. (2012). KIF19A is a microtubule-  
793 depolymerizing kinesin for ciliary length control. *Developmental cell*, *23*(6), 1167-1175.
- 794 Oda, T., Abe, T., Yanagisawa, H., & Kikkawa, M. (2016). Structure and function of outer dynein arm  
795 intermediate and light chain complex. *Mol Biol Cell*, *27*(7), 1051-1059. doi:10.1091/mbc.E15-10-0723
- 796 Otto, T. D., Bohme, U., Jackson, A. P., Hunt, M., Franke-Fayard, B., Hoeijmakers, W. A., . . . Janse, C. J. (2014).  
797 A comprehensive evaluation of rodent malaria parasite genomes and gene expression. *BMC Biol*, *12*,  
798 86. doi:10.1186/s12915-014-0086-0
- 799 Oужи, M., Augereau, J. M., Paloque, L., & Benoit-Vical, F. (2018). Plasmodium falciparum resistance to  
800 artemisinin-based combination therapies: A sword of Damocles in the path toward malaria  
801 elimination. *Parasite*, *25*, 24. doi:10.1051/parasite/2018021
- 802 Prevo, B., Scholey, J. M., & Peterman, E. J. G. (2017). Intraflagellar transport: mechanisms of motor action,  
803 cooperation, and cargo delivery. *FEBS J*, *284*(18), 2905-2931. doi:10.1111/febs.14068
- 804 Roberts, A. J., Kon, T., Knight, P. J., Sutoh, K., & Burgess, S. A. (2013). Functions and mechanics of dynein  
805 motor proteins. *Nat Rev Mol Cell Biol*, *14*(11), 713-726. doi:10.1038/nrm3667
- 806 Rodriguez, M. C., Margos, G., Compton, H., Ku, M., Lanz, H., Rodriguez, M. H., & Sinden, R. E. (2002).  
807 Plasmodium berghei: routine production of pure gametocytes, extracellular gametes, zygotes, and  
808 ookinetes. *Exp Parasitol*, *101*(1), 73-76.
- 809 Savoian, M. S., & Glover, D. M. (2010). Drosophila Klp67A binds prophase kinetochores to subsequently  
810 regulate congression and spindle length. *J Cell Sci*, *123*(Pt 5), 767-776. doi:10.1242/jcs.055905
- 811 Schmidt-Cernohorska, M., Zhernov, I., Steib, E., Le Guennec, M., Achek, R., Borgers, S., . . . Guichard, P. (2019).  
812 Flagellar microtubule doublet assembly in vitro reveals a regulatory role of tubulin C-terminal tails.  
813 *Science*, *363*(6424), 285-288. doi:10.1126/science.aav2567
- 814 Schwach, F., Bushell, E., Gomes, A. R., Anar, B., Girling, G., Herd, C., . . . Billker, O. (2015). PlasmogEM, a  
815 database supporting a community resource for large-scale experimental genetics in malaria  
816 parasites. *Nucleic Acids Res*, *43*(Database issue), D1176-1182. doi:10.1093/nar/gku1143
- 817 Shrestha, S., Hazebaker, M., Yount, A. L., & Walczak, C. E. (2018). Emerging Insights into the Function of  
818 Kinesin-8 Proteins in Microtubule Length Regulation. *Biomolecules*, *9*(1). doi:10.3390/biom9010001
- 819 Sinden, R. E. (1983). The cell biology of sexual development in plasmodium. *Parasitology*, *86* (Pt 4), 7-28.
- 820 Sinden, R. E., Butcher, G. A., & Beetsma, A. L. (2002). Maintenance of the Plasmodium berghei life cycle.  
821 *Methods Mol Med*, *72*, 25-40. doi:10.1385/1-59259-271-6:25
- 822 Sinden, R. E., Canning, E. U., & Spain, B. (1976). Gametogenesis and fertilization in Plasmodium yoelii  
823 nigeriensis: a transmission electron microscope study. *Proc R Soc Lond B Biol Sci*, *193*(1110), 55-76.  
824 doi:10.1098/rspb.1976.0031
- 825 Sinden, R. E., & Croll, N. A. (1975). Cytology and kinetics of microgametogenesis and fertilization in  
826 Plasmodium yoelii nigeriensis. *Parasitology*, *70*(1), 53-65.
- 827 Singh, S. K., Pandey, H., Al-Bassam, J., & Gheber, L. (2018). Bidirectional motility of kinesin-5 motor proteins:  
828 structural determinants, cumulative functions and physiological roles. *Cell Mol Life Sci*, *75*(10), 1757-  
829 1771. doi:10.1007/s00018-018-2754-7
- 830 Sinha, A., Hughes, K. R., Modrzynska, K. K., Otto, T. D., Pfander, C., Dickens, N. J., . . . Waters, A. P. (2014). A  
831 cascade of DNA-binding proteins for sexual commitment and development in Plasmodium. *Nature*,  
832 *507*(7491), 253-257. doi:10.1038/nature12970

- 833 Straschil, U., Talman, A. M., Ferguson, D. J., Bunting, K. A., Xu, Z., Bailes, E., . . . Rita, T. (2010). The Armadillo  
834 repeat protein PF16 is essential for flagellar structure and function in Plasmodium male gametes.  
835 *PLoS One*, 5(9), e12901. doi:10.1371/journal.pone.0012901
- 836 Su, X., Arellano-Santoyo, H., Portran, D., Gaillard, J., Vantard, M., Thery, M., & Pellman, D. (2013).  
837 Microtubule-sliding activity of a kinesin-8 promotes spindle assembly and spindle-length control. *Nat*  
838 *Cell Biol*, 15(8), 948-957. doi:10.1038/ncb2801
- 839 Szklarczyk, D., Franceschini, A., Wyder, S., Forslund, K., Heller, D., Huerta-Cepas, J., . . . von Mering, C. (2015).  
840 STRING v10: protein-protein interaction networks, integrated over the tree of life. *Nucleic Acids Res*,  
841 43(Database issue), D447-452. doi:10.1093/nar/gku1003
- 842 Talman, A. M., Prieto, J. H., Marques, S., Ubaida-Mohien, C., Lawniczak, M., Wass, M. N., . . . Sinden, R. E.  
843 (2014). Proteomic analysis of the Plasmodium male gamete reveals the key role for glycolysis in  
844 flagellar motility. *Malar J*, 13, 315. doi:10.1186/1475-2875-13-315
- 845 Tewari, R., Dorin, D., Moon, R., Doerig, C., & Billker, O. (2005). An atypical mitogen-activated protein kinase  
846 controls cytokinesis and flagellar motility during male gamete formation in a malaria parasite. *Mol*  
847 *Microbiol*, 58(5), 1253-1263. doi:10.1111/j.1365-2958.2005.04793.x
- 848 Unsworth, A., Masuda, H., Dhut, S., & Toda, T. (2008). Fission yeast kinesin-8 Klp5 and Klp6 are  
849 interdependent for mitotic nuclear retention and required for proper microtubule dynamics. *Mol Biol*  
850 *Cell*, 19(12), 5104-5115. doi:10.1091/mbc.E08-02-0224
- 851 van Riel, W. E., Rai, A., Bianchi, S., Katrukha, E. A., Liu, Q., Heck, A. J., . . . Akhmanova, A. (2017). Kinesin-4  
852 KIF21B is a potent microtubule pausing factor. *Elife*, 6. doi:10.7554/eLife.24746
- 853 Viswanadha, R., Sale, W. S., & Porter, M. E. (2017). Ciliary Motility: Regulation of Axonemal Dynein Motors.  
854 *Cold Spring Harb Perspect Biol*, 9(8). doi:10.1101/cshperspect.a018325
- 855 Wang, D., Nitta, R., Morikawa, M., Yajima, H., Inoue, S., Shigematsu, H., . . . Hirokawa, N. (2016). Motility and  
856 microtubule depolymerization mechanisms of the Kinesin-8 motor, KIF19A. *Elife*, 5.  
857 doi:10.7554/eLife.18101
- 858 West, R. R., Malmstrom, T., & McIntosh, J. R. (2002). Kinesins klp5(+) and klp6(+) are required for normal  
859 chromosome movement in mitosis. *J Cell Sci*, 115(Pt 5), 931-940.
- 860 West, R. R., Malmstrom, T., Troxell, C. L., & McIntosh, J. R. (2001). Two related kinesins, klp5+ and klp6+,  
861 foster microtubule disassembly and are required for meiosis in fission yeast. *Mol Biol Cell*, 12(12),  
862 3919-3932. doi:10.1091/mbc.12.12.3919
- 863 Wickstead, B., Carrington, J. T., Gluenz, E., & Gull, K. (2010). The expanded Kinesin-13 repertoire of  
864 trypanosomes contains only one mitotic Kinesin indicating multiple extra-nuclear roles. *PLoS One*,  
865 5(11), e15020. doi:10.1371/journal.pone.0015020
- 866 Wickstead, B., & Gull, K. (2007). Dyneins across eukaryotes: a comparative genomic analysis. *Traffic*, 8(12),  
867 1708-1721. doi:10.1111/j.1600-0854.2007.00646.x
- 868 Wickstead, B., Gull, K., & Richards, T. A. (2010). Patterns of kinesin evolution reveal a complex ancestral  
869 eukaryote with a multifunctional cytoskeleton. *BMC Evol Biol*, 10, 110. doi:10.1186/1471-2148-10-  
870 110
- 871 Woods, A., Sherwin, T., Sasse, R., MacRae, T. H., Baines, A. J., & Gull, K. (1989). Definition of individual  
872 components within the cytoskeleton of Trypanosoma brucei by a library of monoclonal antibodies. *J*  
873 *Cell Sci*, 93 ( Pt 3), 491-500.
- 874 World Health Organization. (2018). World malaria report 2018. Retrieved from  
875 <https://www.who.int/malaria/publications/world-malaria-report-2018/en/>
- 876 Yeoh, L. M., Goodman, C. D., Mollard, V., McFadden, G. I., & Ralph, S. A. (2017). Comparative transcriptomics  
877 of female and male gametocytes in Plasmodium berghei and the evolution of sex in alveolates. *BMC*  
878 *Genomics*, 18(1), 734. doi:10.1186/s12864-017-4100-0
- 879 Yokoyama, R., O'Toole, E., Ghosh, S., & Mitchell, D. R. (2004). Regulation of flagellar dynein activity by a  
880 central pair kinesin. *Proc Natl Acad Sci U S A*, 101(50), 17398-17403. doi:10.1073/pnas.0406817101
- 881 Zeeshan, M., Ferguson, D. J. P., Abel, S., Burrell, A., Rea, E., Brady, D., . . . Tewari, R. (2019). Kinesin-8B  
882 controls basal body function and flagellum formation and is key to malaria parasite transmission.  
883 *bioRxiv*. doi:<https://doi.org/10.1101/686568>

884 Zeeshan, M., Shilliday, F., Liu, T., Abel, S., Mourier, T., Ferguson, D. J. P., . . . Tewari, R. (2019). Plasmodium  
885 Kinesin-8X associates with mitotic spindles and is essential for oocyst development during parasite  
886 proliferation and transmission. *BioRxiv*. doi:<https://doi.org/10.1101/665836>  
887

888

889

890 **Supplementary material**

891

892 **Table S1. Primer sequences for construction of *Pbkin8B-gfp* vector and verification of**  
 893 **integration of *Pbkin8B-gfp*, respectively  $\Delta$ *Pbkin8B*, in the *P. berghei* genome**

| Primer      | <i>kin8B-gfp</i> construct and diagnostic   |
|-------------|---------------------------------------------|
| 111 (SacII) | TCC CCGCGG GGGCCTGACACATCTAATAG             |
| 112b (KpnI) | CATG CCATGG TTTTATTTTTATAATGTTAAAAAGATTTGAG |
| 109         | GAAGGAACCGAACTATTAAATG                      |
| 115         | CTGGGTATCTCGCAAAGCATTG                      |
| 124b        | CACTTTGATGTTTCGAAACCTG                      |
| 34          | TTTCCCAGTCACGACGTTG                         |

| Primer | $\Delta$ <i>Pbkin8B</i> diagnostic |
|--------|------------------------------------|
| GW2b   | GGGTGACTTTGGTGACAGATACTAC          |
| QCR1   | AGCGAGAAGGAATGCCACTACT             |
| QCR2   | ACTCTTTCTCCACATGCGT                |
| GT     | GCCCAGGCCACAAATGTGC                |

894

895 **Table S2. Prevalence and Intensity of mosquito infections**

896

| Genotype                       | Prevalence (% infected <i>A. stephensi</i> mosquitoes) | Mean intensity (oocysts number/midgut) | Range of oocysts number | N (number of mosquitoes) |
|--------------------------------|--------------------------------------------------------|----------------------------------------|-------------------------|--------------------------|
| wt                             | 96                                                     | 180,26                                 | 0-407                   | 50                       |
| $\Delta$ <i>Pbkin8B-cl3600</i> | 24 *                                                   | 1,68 *                                 | 0-17                    | 50                       |
| $\Delta$ <i>Pbkin8B-cl3716</i> | 18 *                                                   | 1,4 *                                  | 0-16                    | 50                       |
| <i>Pbkin8B-gfp</i>             | 98                                                     | 187,02                                 | 0-369                   | 50                       |
|                                |                                                        |                                        |                         |                          |
| Genotype                       | Prevalence (% infected <i>A. stephensi</i> mosquitoes) | Mean intensity (oocysts number/midgut) | Range of oocysts number | N (number of mosquitoes) |
| WT                             | 98                                                     | 171,74                                 | 0-367                   | 50                       |
| $\Delta$ <i>Pbkin8B-cl3600</i> | 20 *                                                   | 1,36 *                                 | 0-12                    | 50                       |
| $\Delta$ <i>Pbkin8B-cl3716</i> | 10 *                                                   | 0,76 *                                 | 0-12                    | 50                       |
| <i>Pbkin8B-gfp</i>             | 92                                                     | 160,36                                 | 0-391                   | 50                       |

897

898 *For each replicate, mice with similar parasitaemias were fed to mosquitoes. Fully fed mosquitoes were kept until midgut*  
899 *dissection, midguts were mounted on slides and oocysts were counted under the microscope. Differences between groups*  
900 *were calculated with Fisher's exact test for prevalence, Mann-Whitney test for intensity. Asterisk \* indicate statistically*  
901 *significant differences with p-values lower than 0.0001 and 0.005, respectively.*

902

903

904 **Table S3. Number of nuclear poles, number nuclear pole with basal bodies and number of**  
905 **basal bodies without nuclear poles**

906

|                  | Cells | NP | NP/BB | BB | Total BB |
|------------------|-------|----|-------|----|----------|
| wt               | 27    | 18 | 20    | 2  | 22       |
| $\Delta Pbkin8B$ | 23    | 13 | 2     | 8  | 10       |

907

908 *Quantification of microtubule organising centres (nuclear poles and basal bodies) in wt and*  
909  *$\Delta Pbkin8B$  gametocytes were counted in 27 wt and 23  $\Delta Pbkin8B$  and gametocytes.*

910

911

912 **Fig S1. Generation and genotypic analysis of *Pbkin8B-gfp* parasites.**

913 (A, B) Generation and genotypic analysis of *Pbkin8B-gfp* parasites. (A) Schematic representation of *Pbkin8B* locus before  
 914 and after insertion of a plasmid containing a partial *Pbkin8B* sequence fused to a *gfp* tag. Single homologous  
 915 recombination occurred between the plasmid and the homologous region of the 3'-terminal part of the genomic locus of  
 916 *Pbkin8B*. Selection was realized using the *Toxoplasma gondii dhfr/ts* resistance marker present in the plasmid. (B)  
 917 Analysis of genomic DNA from *Pbkin8B-gfp* (clones 4 and 6) and wt parasites by PCR. PCR amplifications were realised  
 918 to verify integration of the construct in the correct locus using primers detailed in Supplemental Table 1. Lanes 2, 5 and  
 919 8 correspond to clone 4; lanes 3, 6 and 9 correspond to clone 6. PCR amplification confirmed correct integration of the  
 920 construct (lanes 2 and 3), absence of wt genotype (lanes 5 and 6) and of episomal plasmid (lanes 8 and 9).

921 (C, D) Phenotypic analysis of gametocyte production of *Pbkin8B-gfp* and wt on Giemsa stained blood smears. (C) The  
 922 number of gametocytes was determined for 4 infected mice per genotype. (D) Male sex ratio of *Pbkin8B-gfp* clones 4 and  
 923 6 is similar to wt. Differences between groups were not statistically different. SD are reported as bars on the figures.

924

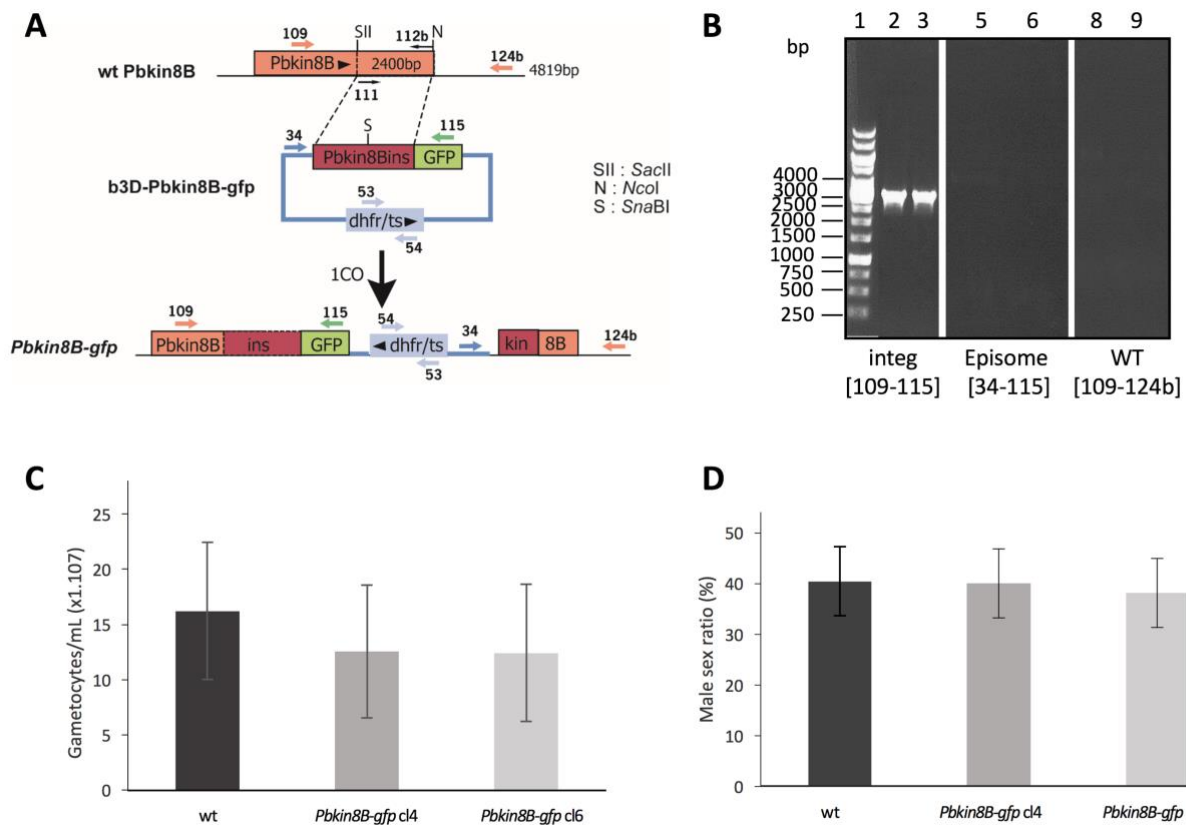

925

926

927

928

929

930

931 **Fig S2. Genotypic and phenotypic analysis of  $\Delta Pbkin8B$  parasites.**

932 (A-C) Generation and genotypic analysis of  $\Delta Pbkin8B$  parasites. (A) Schematic representation of *Pbkin8B* locus before  
 933 and after replacement of the coding sequence by human dihydrofolate reductase thymidilate synthase / yeast cytosine  
 934 deaminase and uridyl phosphoribosyl transferase (*hdhfr/yfcu*) gene which confers resistance to pyrimethamine through  
 935 homologous recombination with the 5' and 3' homology arms of *Pbkin8B* (PBANKA\_020270). Primer positions for  
 936 verification of replacement are indicated by arrows. The transfection vector sourced from the Sanger Institute (*PbGEM*-  
 937 267699). (B, C) Analysis of genomic DNA from  $\Delta Pbkin8B$  (clones 3600 and 3716) and wt parasites by PCR. (B) PCR  
 938 amplifications were realised to verify integration of the construct in the correct locus using primer GT and primer GW2.  
 939 (C) Amplifications with primers QCR2 and QCR1 confirm the absence of *Pbkin8B* gene in the two  $\Delta Pbkin8B$  clones.  
 940 (D, E) Phenotypic analysis of gametocyte production of  $\Delta Pbkin8B$  and wt on Giemsa stained blood smears. (D) The  
 941 number of gametocytes was determined for 4 infected mice per genotype (i.e wt,  $\Delta Pbkin8B$  clone 3600 and clone 3716).  
 942 (E) Male sex ratio of  $\Delta Pbkin8B$  (clones 3600 and 3716) is similar to wt. Differences between groups were not statistically  
 943 different. SD are reported as bars on the figures.

944

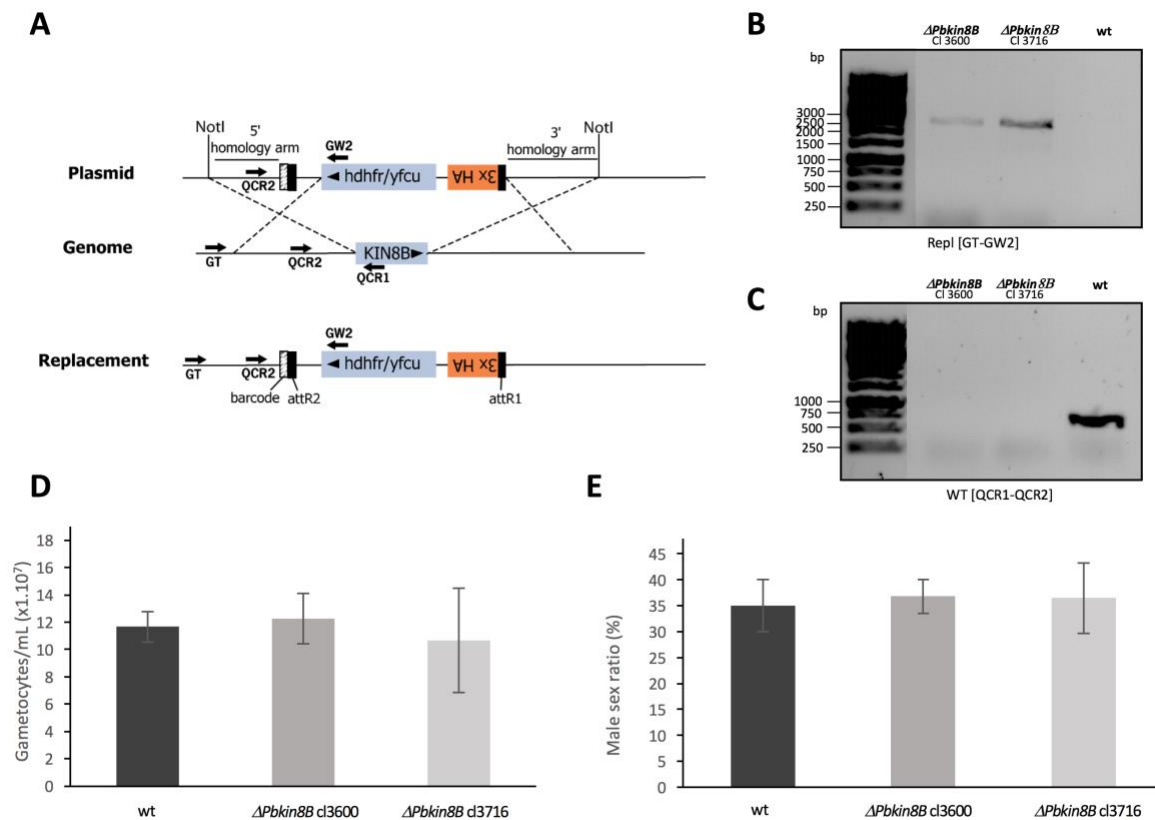

945

946

947

948

949

950 **Fig S3. After activation  $\Delta PbKIN8B$  gametocytes egress quickly from red blood cells**

951 Immunofluorescence assay of wt and  $\Delta Pbkin8B$  male gametocytes at 0 and 8 mpa. DAPI staining of DNA is seen in blue,  
952 TAT1 in green and anti-spectrin in red. Immunofluorescence images correspond to the maximum intensity projection of  
953 the z-series. At 8 mpa, the erythrocyte membrane is degraded compared to 0 mpa, while microtubules have formed in the  
954 cytoplasm. Scale bar: 2  $\mu$ m.

955

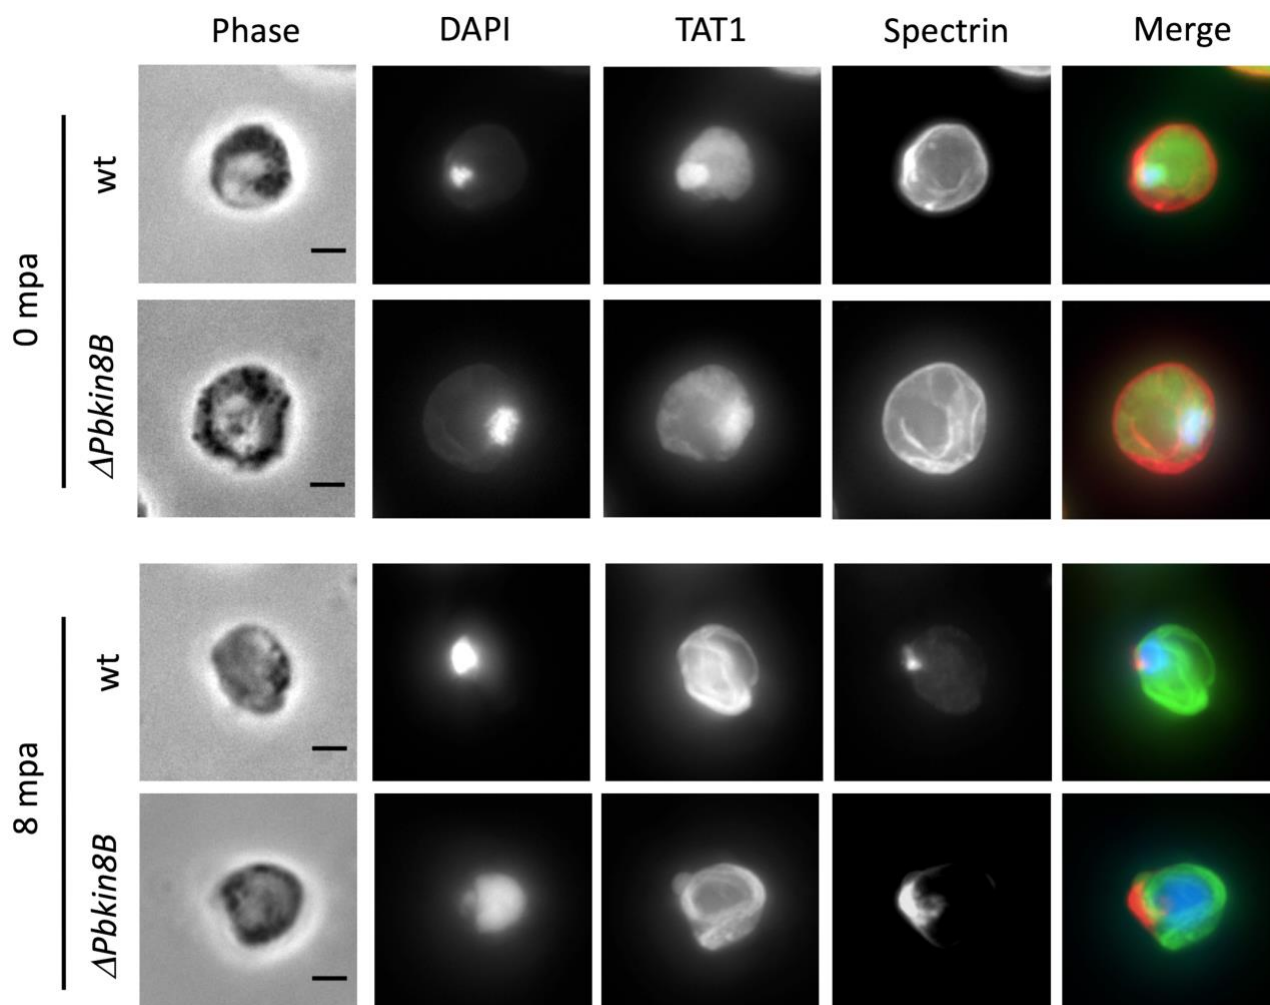

956

957
